# 1 Resting-state directed brain 2 connectivity patterns in adolescents 3 from source-reconstructed EEG 4 signals based on information flow 5 rate

6 **Dionissios T. Hristopoulos<sup>1\*</sup>, Arif Babul<sup>2†</sup>, Shazia Babul<sup>3†</sup>, Leyla R. Brucar<sup>4†</sup>, Naznin  
7 Virji-Babul<sup>4†</sup>**

**\*For correspondence:**

[dchristopoulos@isc.tuc.gr](mailto:dchristopoulos@isc.tuc.gr) (DTH)

<sup>†</sup>These authors contributed equally  
to this work

<sup>‡</sup>These authors also contributed  
equally to this work

8 <sup>1</sup>Telecommunication Systems Research Institute and School of Mineral Resources  
9 Engineering, Technical University of Crete, Chania, Crete, Greece; <sup>2</sup>Department of Physics  
10 and Astronomy, University of Victoria, Victoria, British Columbia, Canada; <sup>3</sup>Rockefeller  
11 College, Princeton University, Princeton, New Jersey, USA; <sup>4</sup>Department of Physical  
12 Therapy, Faculty of Medicine, Djavad Mowafaghian Centre for Brain Health, University of  
13 British Columbia, Vancouver, British Columbia, Canada

---

14

15 **Abstract** Quantifying the brain's effective connectivity offers a unique window onto the causal  
16 architecture coupling the different regions of the brain. Here, we advocate a new, data-driven  
17 measure of directed (or effective) brain connectivity based on the recently developed information  
18 flow rate coefficient. The concept of the information flow rate is founded in the theory of stochastic  
19 dynamical systems and its derivation is based on first principles; unlike various commonly used  
20 linear and nonlinear correlations and empirical directional coefficients, the information flow rate  
21 can measure causal relations between time series with minimal assumptions. We apply the  
22 information flow rate to electroencephalography (EEG) signals in adolescent males to map out the  
23 directed, causal, spatial interactions between brain regions during resting-state conditions. To our  
24 knowledge, this is the first study of effective connectivity in the adolescent brain. Our analysis  
25 reveals that adolescents show a pattern of information flow that is strongly left lateralized, and  
26 consists of short and medium ranged bidirectional interactions across the frontal-central-temporal  
27 regions. These results suggest an intermediate state of brain maturation in adolescence.

---

28

## 29 Introduction

30 The brain is a complex entity comprising widely distributed but highly interconnected regions, the  
31 dynamic interplay of which is essential for brain function. Establishing how activity is coordinated  
32 across these regions to give rise to organized (higher order) brain functions ranks as one of the key  
33 challenges in neuroscience. Various measures of brain connectivity are in use for this purpose as  
34 discussed in (*Friston, 1994; Horwitz, 2003; Sporns, 2011; Rubinov and Sporns, 2010; Friston, 2011;*  
35 *Cohen, 2014*) and references therein. Structural measures are based on confirmed anatomical  
36 connections between brain regions. Functional measures involve dynamically changing, linear  
37 or nonlinear, non-directional coefficients of statistical dependence (e.g., correlation, covariance,  
38 phase-locking values, coherence) that may appear between structurally unconnected regions. Effec-  
39 tive brain connectivity measures capture directionally dependent interactions between different  
40 brain regions and aim to identify causal mechanisms in neural processing. In the following, we  
41 use the terms “effective” and “directed” connectivity interchangeably. We refer readers to *Sakkalis*  
42 (*2011*) and *Bastos and Schoffelen (2015)* for recent reviews of functional and effective connectiv-  
43 ity measures in the brain. Herein, we investigate effective connectivity patterns as revealed by  
44 electroencephalography (EEG) recordings (*Van de Ville et al., 2010*) of scalp electromagnetic fields  
45 following source-space reconstruction.

46 The multichannel EEG signals, which are thought to reflect activity in the underlying brain  
47 regions, offer a convenient window into the temporal dynamics of the corresponding brain-scale  
48 neuronal networks. EEG studies have been extensively used to infer the nature of the functional  
49 connectivity — i.e. the linear or nonlinear statistical interdependence between the electrical activity  
50 in the different brain regions (*Stam and Van Straaten, 2012*) — during resting state or during task  
51 related activities. In this paper, we focus our attention on the former.

52 The resting-state or persistent background activity, previously dismissed as background noise,  
53 has been shown to comprise coherent patterns of functional connectivity and appears to play a  
54 critical role in mediating complex functions such as memory, language, speech and emotional  
55 states (*Raichle et al., 2001; Raichle and Mintun, 2006*). There has been considerable progress in  
56 mapping out the key resting-state functional brain networks as well as tracking how they change  
57 over development. These functional connectivity studies indicate that the resting-state brain  
58 networks are sparsely connected in childhood (*Fair et al., 2008*) and evolve towards increased  
59 connectivity in adolescence (*Smit et al., 2012*). However, a more complete description remains  
60 elusive. For one, very little is known about how information flows within these networks, and how  
61 these flow patterns change with maturation.

62 Several different approaches are in use for quantifying the brain’s effective connectivity. Struc-  
63 tural approaches such as Structural Equation Modeling (SEM) (*McIntosh and Gonzalez-Lima, 1994*)  
64 and Dynamic Causal Modeling (*Friston et al., 2003*) involve a neuroanatomical model of the brain  
65 and a connectivity model. Other measures are data-driven and involve a statistical model, such  
66 as Granger-causality-based methods (*Kamiński et al., 2001; Hesse et al., 2003; Roebroek et al.,*  
67 *2005; Ding et al., 2006; Bressler and Seth, 2011; Seth et al., 2015*). A different data-driven approach  
68 involves information theoretic measures, like transfer entropy (*Schreiber, 2000; Vicente et al., 2011*)

69 and partial directed coherence (*Baccalá and Sameshima, 2001*). Each approach has its advantages  
70 and disadvantages [see (*Lindquist, 2008; Liu and Aviyente, 2012*) and the Discussion section below]  
71 in terms of the assumptions involved and the computational effort required. The fact that all  
72 methods currently used make assumptions the validity of which has not been fully tested, leaves  
73 room for introducing new measures of effective connectivity (*Lindquist, 2008*). This motivates the  
74 investigation of new measures of directed connectivity.

75 We have two goals in this paper. Our first goal is to advocate a new measure of data-driven  
76 effective brain connectivity by applying the novel concept of information flow rate to EEG signals.  
77 This goal is motivated by the need to define measures of connectivity that are based on fewer or  
78 more suitable model assumptions than commonly used methods (*Lindquist, 2008*). The information  
79 flow rate has several desirable properties (as summarized below and elaborated in the Discussion  
80 section) which give it unique advantages for connectivity analysis compared with standard methods.  
81 To the best of our knowledge, our study is the first to apply the information flow rate to neuroscience  
82 data. Our second goal is to analyze EEG resting-state data from a group of healthy adolescents  
83 using the information flow rate, in order to identify connectivity patterns in the adolescent brain.  
84 Only one prior study that focuses on this age group is available in the literature, and the connectivity  
85 analysis in that study is carried out in sensor space (*Marshall et al., 2014*).

86 The information flow rate was developed by Liang using the concept of information entropy  
87 and the theory of dynamical systems (*Liang, 2008, 2013b, 2014, 2015*) and based on earlier work  
88 with Kleeman (*Liang and Kleeman, 2005*). While the the initial formulation of the information flow  
89 rate was derived for two-dimensional (bivariate) systems, *Liang (2016, 2018)* recently showed that  
90 the formulation is also valid for  $N$ -dimensional systems as well. The Liang-Kleeman coefficient can  
91 measure the transfer of information between time series at different locations and thus between  
92 different brain regions. Unlike empirical measures of causality, e.g., transfer entropy and Granger  
93 causality, the information flow rate is derived from general, first-principles equations for the  
94 time evolution of stochastic dynamical systems (*Liang, 2016, 2018*). Owing to its definition, which  
95 involves only the time series and their temporal derivatives (or their finite-difference approximations  
96 for discretely sampled systems), the information flow rate has computational advantages over  
97 other entropy-based measures such as transfer entropy, that require the estimation of additional  
98 information (e.g., conditional probabilities) from the data. In addition, the information flow rate  
99 concept does not require stationarity (*Liang, 2015*) or a specific model structure, and can also be  
100 applied to deterministic nonlinear systems (*Liang, 2016*). These are important advantages, since  
101 the EEG signals exhibit non-stationary features evidenced in transitions between quasi-stationary  
102 periods and nonlinear dynamic behavior (*Blanco et al., 1995; Kaplan et al., 2005; Klonowski, 2009*).

## 103 Results

104 We set out to investigate patterns of resting-state effective connectivity in the brain of adolescent  
105 males, using source-reconstructed EEG signals (see Materials and methods). Our analysis of con-  
106 nectivity is based on the Liang-Kleeman information flow rate described in **Box 1**. The information  
107 flow rate measures the effect of a time series  $i$ , called *transmitter*, on a different time series  $j$ ,  
108 called *receiver*. The indices  $i$  and  $j$  correspond to different brain source locations. In particular, we

109 use a normalized version of the information flow rate which is better suited for ranking pair-wise  
110 information flow rates for an ensemble of  $N_s$  time series based on their relative impact on the  
111 *receiver time series* (see Materials and methods for details). Herein  $N_s = 15$  corresponds to the  
112 numbers of source locations obtained by source-space reconstruction. The brief comment in **Box 2**  
113 provides an intuitive understanding of causal relations in terms of the information flow rate.

170 To quantify effective brain connectivity, we use the *normalized information flow rate*  $\tau_{i \rightarrow j}$  (defined  
171 by **Equation 9** in Material and methods). The time series that we analyze involve the magnitudes of  
172 fifteen *current dipole moments* per individual. These are obtained by means of source reconstruction  
173 of scalp EEG signals as described in Materials and Methods. We focus on the *normalized inter-dipole*  
174 *information flow rate* instead of the non-normalized  $T_{i \rightarrow j}$ , because we aim to capture interactions  
175 between brain regions that significantly affect the *receiver* region (denoted by the index  $j$ ). The  
176 advantage of  $\tau_{i \rightarrow j}$  is its ability to measure the *relative importance* of causal relations (**Liang, 2015**).

177 We use the second-neighbor differencing scheme (i.e.,  $k = 2$ , see **Box 1**) to calculate the informa-  
178 tion flow rates as suggested by **Liang (2014)**. We further comment on this choice in Materials and  
179 methods (section on the impact of differencing scheme).

180 Our analysis focuses on the *mean information flow rate* calculated over all the individuals in the  
181 study cohort, but we also explore variations of connectivity between individuals.

## 182 **Brain connectivity based on mean information flow rate**

183 To study the information flow across brain regions we want to characterize connections that exhibit  
184 significant levels of activity (as measured by the information flow rate) over all the individuals. We  
185 do this using the *ensemble mean* of the normalized information flow rate  $i \rightarrow j$  evaluated over the  
186 cohort of  $L = 32$  individuals:

$$\bar{\tau}_{i \rightarrow j} = \frac{1}{L} \sum_{l=1}^L \tau_{i \rightarrow j}^{(l)}, \quad i \neq j = 1, \dots, N_s. \quad (5)$$

187 The top panel in **Figure 1** displays the patterns of the *mean information flow rate*  $\bar{\tau}_{i \rightarrow j}$ . The  
188 variable  $\bar{\tau}_{i \rightarrow j}$  for all values of *transmitter*  $i$  and *receiver*  $j$  source locations is represented by an  $N_s \times N_s$   
189 matrix that represents all possible (i.e., 210) connections between sources. The number of possible  
190 connections is  $N_s \times (N_s - 1)$  where  $N_s = 15$  is the number of source dipoles. The value of a grid  
191 cell (L1, L2), determined by the label L1 on the vertical axis and the label L2 on the horizontal axis,  
192 represents information flow from dipole L1 to dipole L2. The matrix cells are colored according to  
193 the value of  $\bar{\tau}_{i \rightarrow j}$ : the values increase as the color changes from blue to red. The cells along the  
194 main diagonal are not colored, indicating that the information flow rate from  $i \rightarrow j$  is only defined  
195 if  $i \neq j$ . The color pattern (thus, also the matrix  $\bar{\tau}_{i \rightarrow j}$ ) is *asymmetric* along the main diagonal. This  
196 asymmetry reflects the directionality of the information flow rate, i.e., the fact that  $\tau_{i \rightarrow j}$  is in general  
197 different than  $\tau_{j \rightarrow i}$ .

198 A relevant question for interpreting the results is how many of the 210 connections (represented  
199 by the off-diagonal matrix cells) shown in **Figure 1** are important. As we discuss in Material and  
200 methods, it can be shown by *permutation testing* that the vast majority of the connections for all  
201 the individuals are statistically significant even at the  $p = 0.001$  level. However, very low values of  
202 information flow rate, albeit statistically significant, imply that the relative impact of the *transmitter*

115

### Box 1. The Liang-Kleeman information flow rate

116

Let  $\{p_i(t_n)\}_{n=1}^N$  denote a collection of  $N_s$  time series at different brain source locations indexed by  $i = 1, \dots, N_s$ . Herein, the term “time series” implies EEG-derived series of current dipole moments.

117

118

The *Liang-Kleeman coefficient*  $T_{i \rightarrow j}$  measures the rate of information flow from the time series  $i$  to the time series  $j$  (where  $j \neq i$ ).  $T_{i \rightarrow j}$  can be expressed in terms of *sample statistics* as follows (**Liang, 2014**)

120

121

122

$$T_{i \rightarrow j} = \frac{\hat{r}_{i,j}}{1 - \hat{r}_{i,j}^2} (\hat{r}_{i,dj} - \hat{r}_{i,j} \hat{r}_{j,dj}), \text{ for } i, j = 1, \dots, N_s, i \neq j. \quad (1)$$

123

124

125

In the above, the *linear (Pearson) sample correlation coefficient* between the time series  $p_i$  and  $p_j$  is defined by

126

127

128

$$\hat{r}_{i,j} = \frac{\hat{C}_{i,j}}{\hat{\sigma}_i \hat{\sigma}_j}, \text{ for } i, j = 1, \dots, N_s, i \neq j, \quad (2)$$

129

130

131

132

where  $\hat{C}_{i,j}$  is the *sample cross-covariance* of the series  $p_i$  and  $p_j$ , and  $\hat{\sigma}_i = \sqrt{\hat{C}_{i,i}}$  is the sample standard deviation of the series  $p_i$  ( $i = 1, \dots, N_s$ ). Both  $\hat{C}_{i,j}$  and  $\hat{r}_{i,j}$  (often used to measure functional connectivity) are non-directional and symmetric under the index interchange  $i \leftrightarrow j$ .

133

134

The sample cross-covariance  $\hat{C}_{i,j}$  is defined by

135

136

$$\hat{C}_{i,j} = \overline{p_i p_j} - \overline{p_i} \overline{p_j}, \text{ for } i, j = 1, \dots, N_s,$$

137

138

139

where the “overline” denotes the sample time average, i.e.,  $\overline{p_i} = \frac{1}{N} \sum_{n=1}^N p_{i,n}$  and  $\overline{p_i p_j} = \frac{1}{N} \sum_{n=1}^N p_{i,n} p_{j,n}$ . If  $i = j$  the above equation returns the variance of  $p_i$ , i.e.,  $\hat{C}_{i,i} = \hat{\sigma}_i^2$ .

140

141

142

The *cross-correlation coefficients*  $\hat{r}_{i,dj}$ , where  $i, j = 1, \dots, N_s$ , in **Equation 1** involve the time series  $p_i$  and the *temporal derivative*  $dp_j/dt$  of the time series  $p_j$ . These coefficients are expressed in terms of the respective covariances as follows

143

144

145

$$\hat{r}_{i,dj} = \frac{\hat{C}_{i,dj}}{\hat{\sigma}_i \hat{\sigma}_j}, \text{ for } i, j = 1, \dots, N_s. \quad (3)$$

146

147

148

149

where  $\hat{C}_{i,dj}$  is the sample covariance of the time series  $p_i$  and the first derivative,  $dp_j/dt$ , of the series  $p_j$ . Due to the discrete nature of sampling, the first derivative  $dp_j/dt$  is unknown *a priori*. Hence, a finite difference approximation based on the Euler forward scheme, with a time step equal to  $k\Delta t$ , is used, i.e.,

150

151

152

$$\frac{dp_{j,n}}{dt} = \frac{p_{j,n+k} - p_{j,n}}{k \Delta t}, \text{ for } j = 1, \dots, N_s, n = 1, \dots, N - k. \quad (4)$$

153

154

155

156

157

158

The differencing orders  $k = 1$  and  $k = 2$  are the two most common choices (**Liang, 2013a**) which we also consider herein.

Herein we refer to  $p_i$  as the *transmitter series* and to  $p_j$  as the *receiver series* with respect to  $T_{i \rightarrow j}$ . We adopt the term *transmitter* instead of “source” for the series that “sends” information in order to avoid confusion, since all the time series represent *current dipole moments* obtained from scalp EEG by means of *source reconstruction*.

## Box 2. Causality and the Liang-Kleeman coefficient

Consider two time series  $p_i$  and  $p_j$ , where  $i, j = 1, \dots, N_s$  and  $j \neq i$ . According to the Liang-Kleeman formalism which is based on the notion of information entropy, the series  $p_j$  has a causal effect on  $p_i$  if the rate of change of  $p_i$  depends on  $p_j$ . Conversely,  $p_i$  has a causal effect on  $p_j$  if the rate of change of  $p_j$  depends on  $p_i$ . Hence, the following four possibilities arise:

1. Neither  $p_i$  influences  $p_j$ , nor  $p_j$  influences  $p_i$  :  $T_{i \rightarrow j} = T_{j \rightarrow i} = 0$ .
2. Only  $p_i$  influences  $p_j$ , but  $p_j$  does not influence  $p_i$  :  $T_{i \rightarrow j} \neq 0, T_{j \rightarrow i} = 0$ .
3. Only  $p_j$  influences  $p_i$ , but  $p_i$  does not influence  $p_j$  :  $T_{i \rightarrow j} = 0, T_{j \rightarrow i} \neq 0$ .
4. Both  $p_i$  and  $p_j$  influence each other :  $T_{i \rightarrow j} \neq 0, T_{j \rightarrow i} \neq 0$ .
5.  $T_{i \rightarrow i}$  does not have a physical meaning and is thus undefined.

series on the *receiver* is not neurologically important. On the other hand, there is no golden rule for selecting a threshold value above which connections are considered important (Cohen, 2014). Hereafter, we will consider that a connection  $i \rightarrow j$  between two dipoles is *active in the ensemble sense* if the magnitude of the normalized information flow rate  $|\tau_{i \rightarrow j}|$  exceeds the arbitrary threshold of  $\tau_c = 0.05$ . This means that the entropic rate of change at the *receiver*  $j$  due to its interaction with the *transmitter* located at  $i$  is at least 5% of the total rate of entropy change at  $j$ . (We further comment on the selection  $\tau_c = 0.05$  in connection with Figure 3 below.) The bottom panel of Figure 1 shows the mean information flow rate for the connections that are active in the ensemble sense. The latter involve only connections such that  $\bar{\tau}_{i \rightarrow j} \geq 0.05$ . As evidenced in this plot, 92 out of the 210 inter-dipole pairs are connected on average, i.e., they exhibit  $\bar{\tau}_{i \rightarrow j} \geq \tau_c$ .

The top thirty (30) active connections, ranked on the basis of  $\bar{\tau}_{i \rightarrow j}$ , are listed in Table 1 and displayed by arrows on an axial view schematic in Figure 2. All thirty connections correspond to positive values of  $\bar{\tau}_{i \rightarrow j}$  in the interval between 0.116 (highest) and 0.072 (lowest). All of them have values higher than the threshold  $\tau_c = 0.05$ . Evaluating the thirty top connections (cf. Figure 2), the overall information flow pattern is predominantly left lateralized and consists of mostly short and medium range bidirectional connections linking the frontal, central and temporal regions of the brain. The possible neurological insights derived from Table 1 and Figure 2 are developed in the Discussion section.

The last column of Table 1 displays the *polarization*  $P(\tau_{i \rightarrow j})$  of the information flow rate. This ensemble measure is given by the average sign of  $\tau_{i \rightarrow j}$  expressed as a percentage, i.e.,

$$P(\tau_{i \rightarrow j}) = \frac{100}{L} \sum_{l=1}^L \text{sgn}(\tau_{i \rightarrow j}^{(l)}), \quad (6)$$

where  $\text{sgn}(\cdot)$  is the sign function defined by  $\text{sgn}(x) = 1$ , if  $x > 0$ ,  $\text{sgn}(x) = -1$ , if  $x < 0$  and  $\text{sgn}(x) = 0$ , if  $x = 0$ . The polarization is a number close to  $\pm 100\%$  if the sign of the  $\tau_{i \rightarrow j}$  is typically the same for all the individuals (if all the signs are the same the polarization is 100%). In Table 1 the polarization varies between  $\approx 88\%$  and 100% and is less than 100% only for eight connections. This means that for the vast majority of connections, the variations between individuals affect the magnitude but not the sign of the normalized information flow rate.

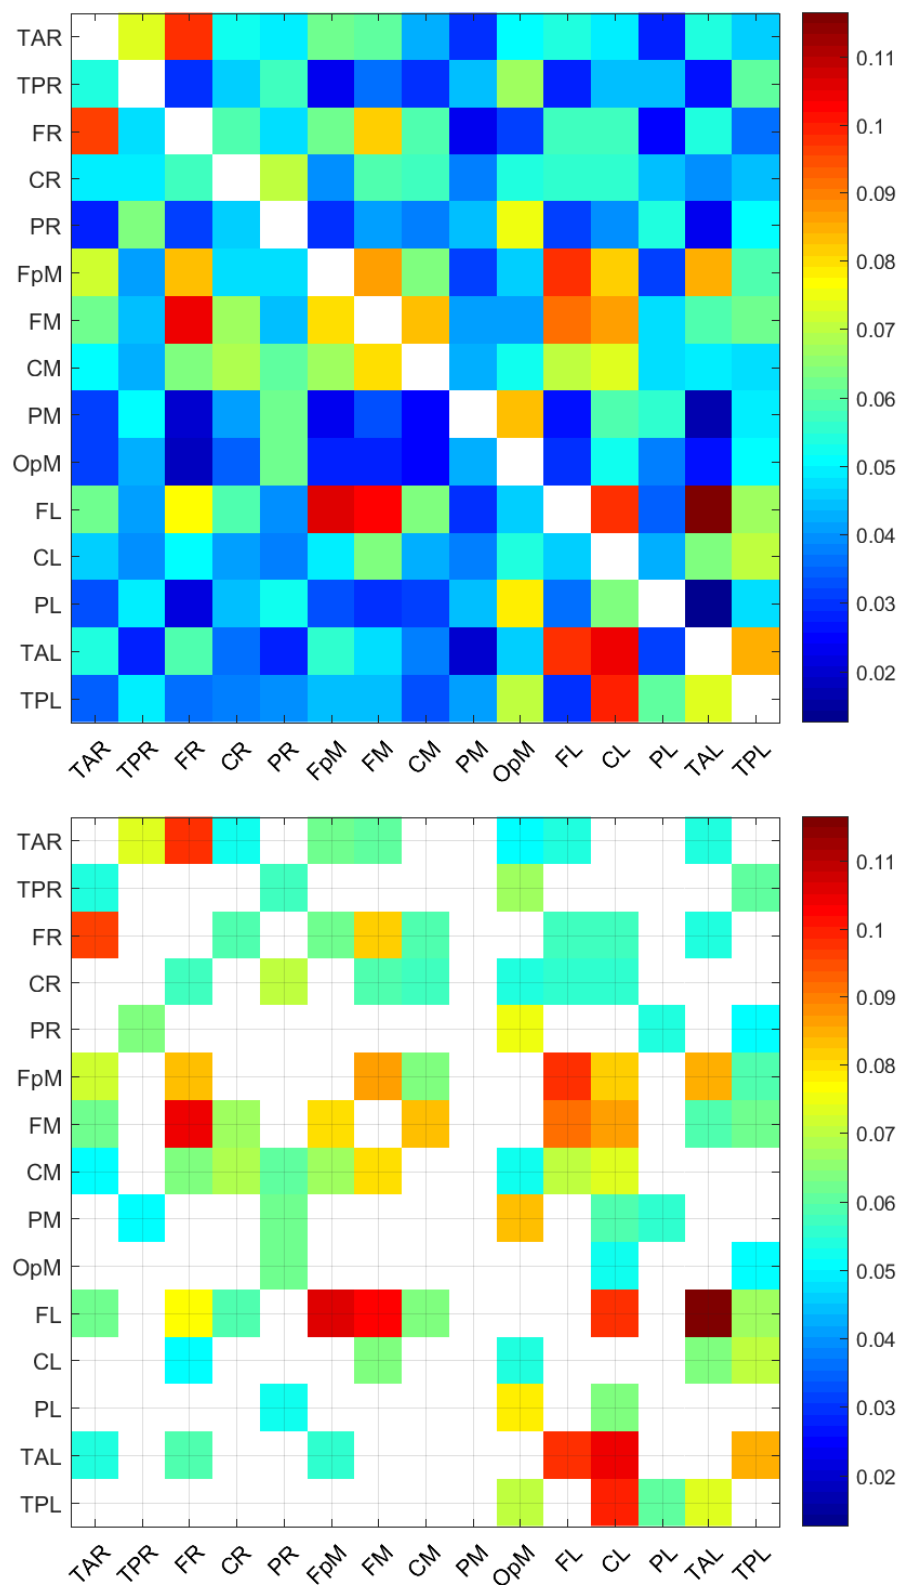

**Figure 1.** Mean normalized information flow rates,  $\bar{\tau}_{i \rightarrow j}$ , calculated over all the individuals in the study cohort (top) and corresponding values for connections above the threshold  $\tau_c = 0.05$  (bottom). There are 92 connections with  $\bar{\tau}_{i \rightarrow j} \geq \tau_c$ .

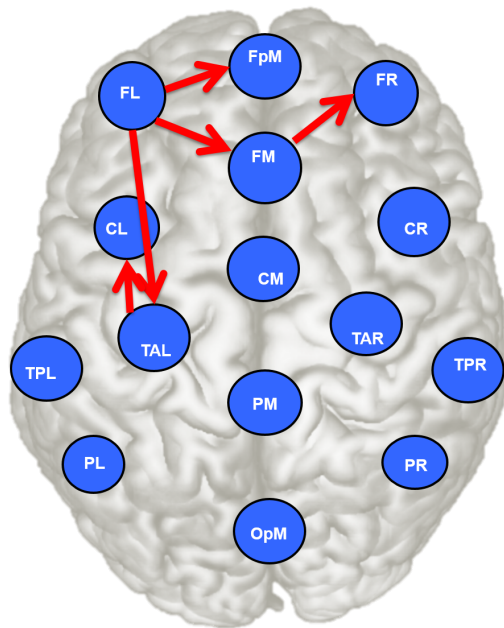

(a) Top 5 connections

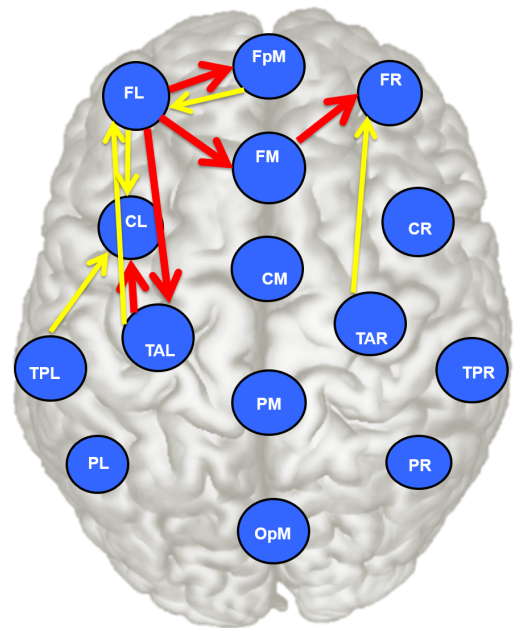

(b) Top 10 connections

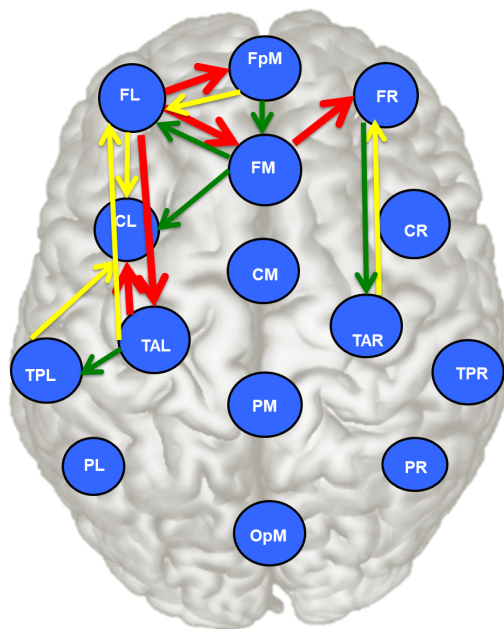

(c) Top 15 connections

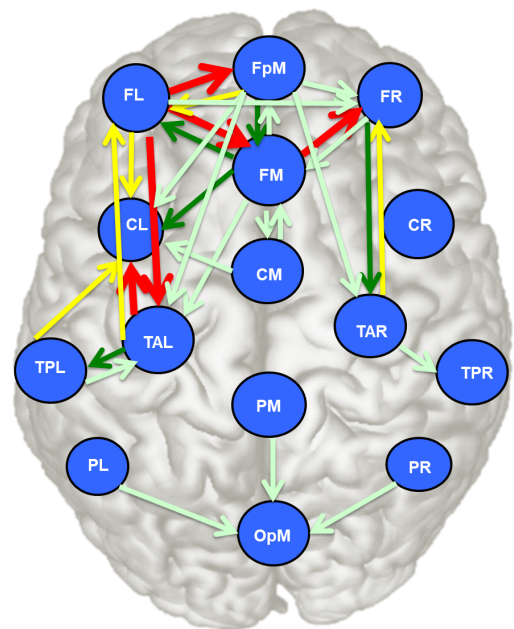

(d) Top 30 connections

**Figure 2.** Axial-view schematic showing the main pathways of information flow based on the mean normalized information flow rates shown in *Table 1*. The schematic shows the locations of the sources in BESA's 15 pre-defined regions (see Description of EEG data in Materials and methods). (a) Five most important connections shown in red arrows (color online). (b) Ten most important connections; connections ranked from six to ten are shown with yellow arrows. (c) Fifteen most important connections with those ranked from 11 to 15 shown with green arrows. (d) Thirty most important connections with those ranked from 15 to 30 shown in light green arrows (cf. *Table 1*).



229 A different way to view the relation between the ensemble mean  $\bar{\tau}_{i \rightarrow j}$  and the information flow  
230 rates of individuals is by counting for how many individuals each connection is active. Hereafter, we  
231 will consider that a connection  $i \rightarrow j$  between two dipoles is *individually active* if the magnitude of the  
232 normalized information flow rate  $|\tau_{i \rightarrow j}|$  exceeds the threshold  $\tau_c$ , which means that the percentage  
233 of the total entropy rate of the *receiver* due to its interaction with the *transmitter* is at least 5%. We  
234 assume that the threshold for individually active connections is the same as the threshold used for  
235 the ensemble mean of the information flow rate. However, this is not necessary in general.

236 We define the *frequency of activity*,  $n_{i \rightarrow j}(\tau_c)$ , for the connection  $i \rightarrow j$  as the number of individuals  
237 in the study cohort for which the specific connection is active. Hence,

$$n_{i \rightarrow j}(\tau_c) = \sum_{l=1}^L \theta(|\tau_{i \rightarrow j}^{(l)}| - \tau_c), \quad (7)$$

238 where  $\theta(\cdot)$  is the unit step function, i.e.,  $\theta(x) = 1$ , for  $x \geq 0$  and  $\theta(x) = 0$  for  $x < 0$ . The frequency of  
239 activity is evaluated over all the individuals and takes values integer  $n_{i \rightarrow j}(\tau_c) \in \{0, 1, \dots, L\}$ , where  
240  $L = 32$  is the number of individuals in the cohort. The frequency of activity depends on  $\tau_c$ , as higher  
241 values of  $\tau_c$  imply a smaller number of active connections.

242 In **Figure 3**, we explore the correlation between the ensemble mean  $\bar{\tau}_{i \rightarrow j}$  and the number  
243 of individually active connections  $n_{i \rightarrow j}(\tau_c)$ . The scatter plot shows an almost linear dependence  
244 between the number of individually active connections and the respective value of  $\bar{\tau}_{i \rightarrow j}$  for values  
245 of  $\bar{\tau}_{i \rightarrow j} \leq 0.07$  and appears to level off at higher values of  $\bar{\tau}_{i \rightarrow j}$ . At the same time, the scatter also  
246 increases towards these higher values. We can also use this plot as a guide for selecting a suitable  
247 threshold for ensemble-based connectivity analysis, since it reveals how the threshold imposed  
248 on  $\bar{\tau}_{i \rightarrow j}$  (shown as a vertical red line in **Figure 3**) affects the number of active connections, i.e., the  
249 number of markers to the right of the vertical line at  $\tau_c$ . However, note that the frequency of the  
250 connections in individuals (i.e., the values on the vertical axis) will change if a different threshold  
251 is used to estimate individual activity. Essentially, the plot would need to be redrawn for different  
252 values of individual  $\tau_c$ .

### 253 **Information flow rate patterns per individual**

254 To study the information flow across brain regions in individuals, we focus on the *individually active*  
255 source dipole pairs. As stated above, these are dipole pairs with  $\tau_{i \rightarrow j}$  whose magnitude (absolute  
256 value) exceeds the threshold  $\tau_c = 0.05$ . We use the criterion  $|\tau_{i \rightarrow j}| > \tau_c$  instead of  $\tau_{i \rightarrow j} > \tau_c$  since there  
257 are a few pairs (nine out of a total of 6720) with values of  $\tau_{i \rightarrow j} < -0.05$ .

258 For each of the 32 individuals in the study, we calculate 210 values of normalized inter-dipole  
259 information flow rates  $\tau_{i \rightarrow j}$ . To calculate  $\tau_{i \rightarrow j}$ , we use all the time points in the EEG time series. The  
260  $\tau_{i \rightarrow j}$  values over all individuals range from  $-0.0794$  to  $0.3568$ . The matrix of the  $\tau_{i \rightarrow j}$  values for *each*  
261 *individual* is depicted in **Figure 4-Figure 7**. Each plot corresponds to a single individual and shows  
262 an  $N_s \times N_s$  square grid that represents all the possible connections between sources. The value of  
263 each grid cell in **Figure 1** is equal to the average (evaluated over all the individuals) of the values of  
264 the respective grid cells in **Figure 4-Figure 7**.

265 These plots display the values of  $\tau_{i \rightarrow j}$  for all source dipole pairs, regardless of whether the  
266 connections are active with respect to the threshold  $\tau_c$  or not. All the plots use a unified colormap

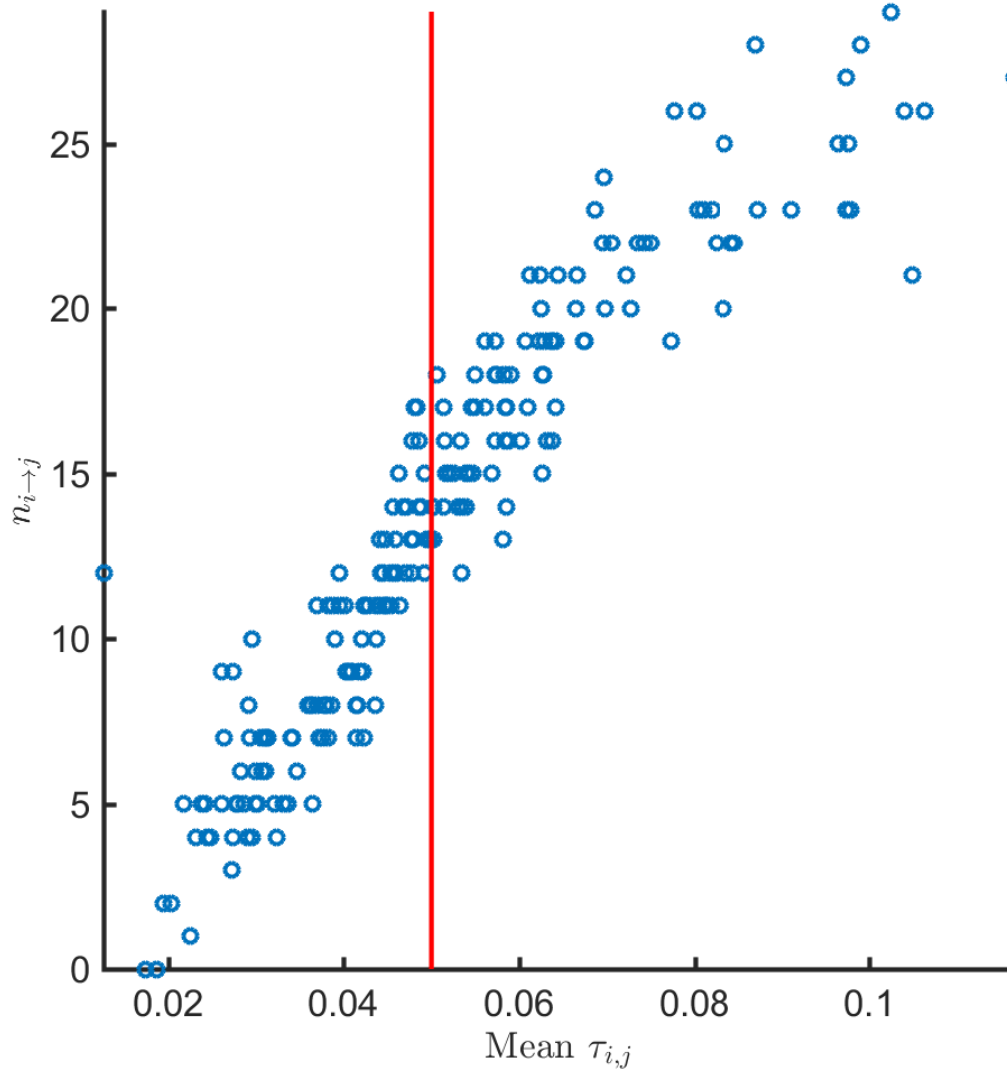

**Figure 3.** Frequency  $n_{i \rightarrow j}(\tau_c)$  of individually active connections (based on the individual threshold  $\tau_c = 0.05$ ) plotted against the ensemble mean of normalized flow rate coefficient  $\tau_{i \rightarrow j}$  for the connection *transmitter*  $i \rightarrow$  *receiver*  $j$  for all  $i \neq j = 1, \dots, 15$ . The plot comprises 210 points, each of which corresponds to a different  $i \rightarrow j$  connection between two source dipoles. The frequency of activity  $n_{i \rightarrow j}(\tau_c)$  is calculated over all  $L = 32$  individuals in the cohort based on [Equation 7](#) and thus its upper bound is equal to  $L$ . The ensemble mean  $\bar{\tau}_{i \rightarrow j}$  is calculated based on [Equation 5](#). The vertical red line marks the threshold value  $\tau_c = 0.05$ . All the markers to the right of the vertical line correspond to connections  $i \rightarrow j$  which are on average above the threshold.

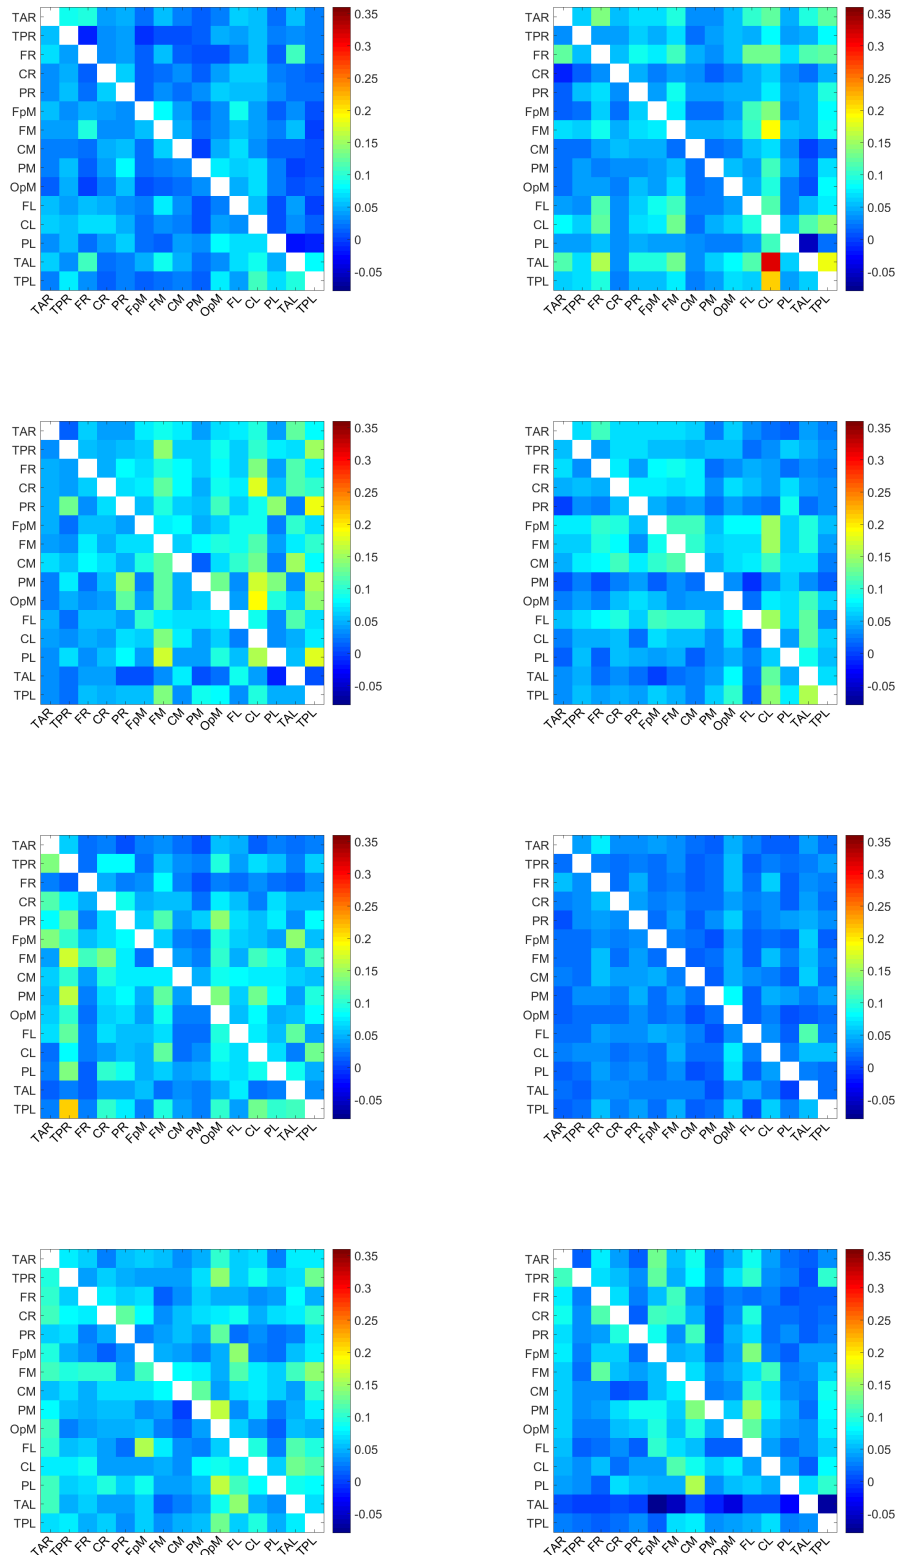

**Figure 4.** Map of  $\tau_{i \rightarrow j}$  values for the individuals 1-8. A uniform color map is used based on the range of  $\tau_{i \rightarrow j}$  values for all 32 individuals. The value of a grid cell (L1, L2), determined by the label L1 on the vertical axis and the label L2 on the horizontal axis, represents information flow from the dipole with label L1 to the dipole with label L2. The  $\tau_{i \rightarrow j}$  values over all dipoles and individuals range from  $-0.08$  to  $0.36$ .

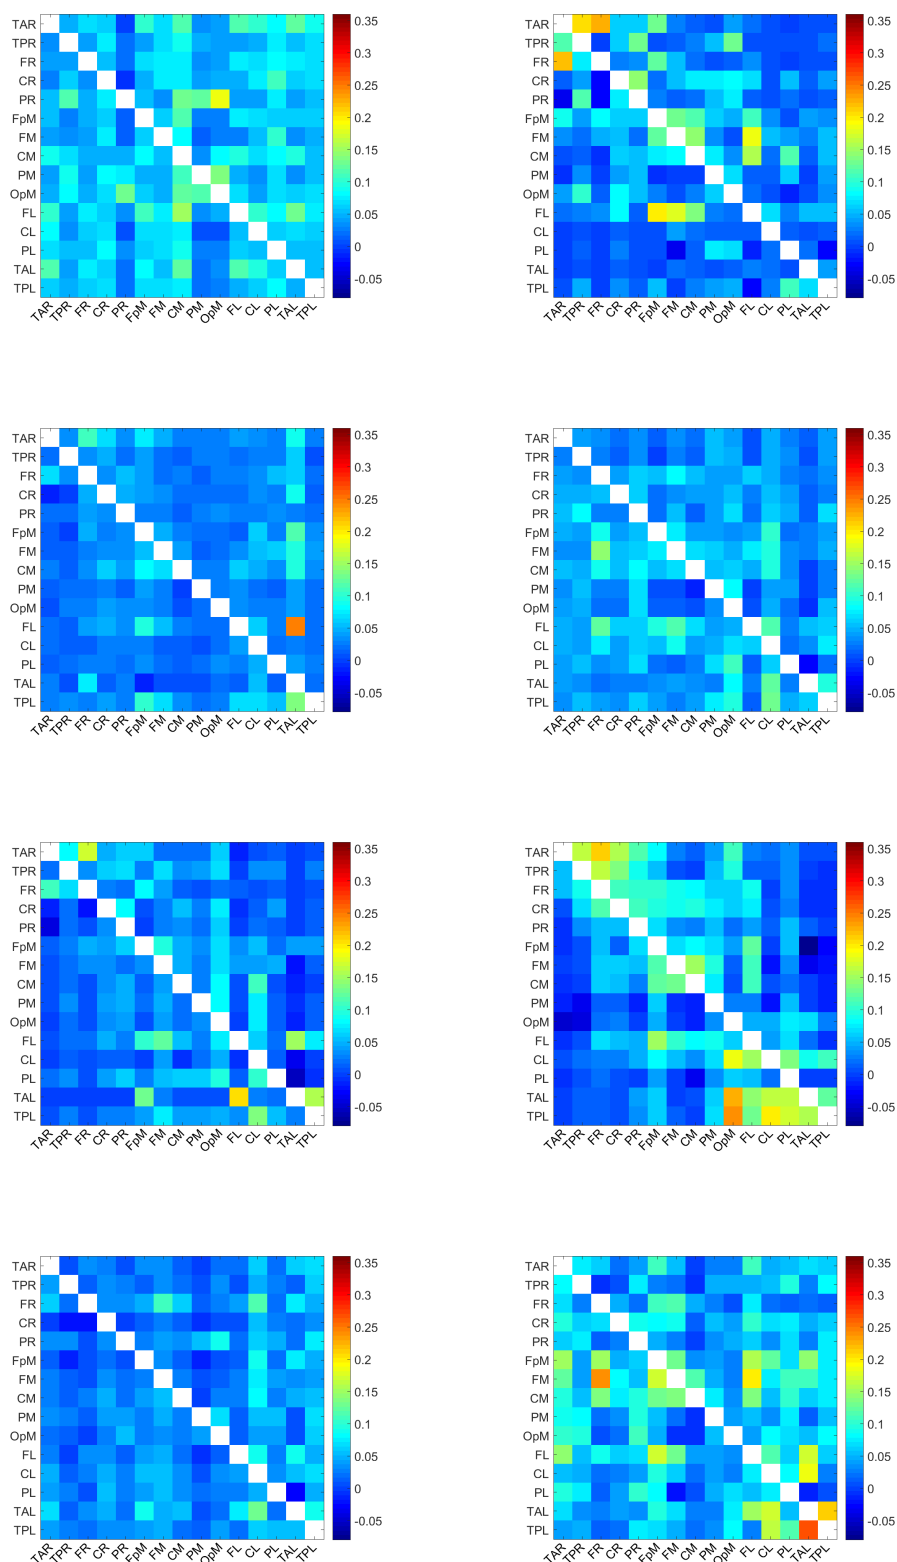

**Figure 5.** Map of  $\tau_{i \rightarrow j}$  values for the individuals 9-16. A uniform color map is used based on the range of  $\tau_{i \rightarrow j}$  values for all 32 individuals. The value of a grid cell (L1, L2), determined by the label L1 on the vertical axis and the label L2 on the horizontal axis, represents information flow from the dipole with label L1 to the dipole with label L2. The  $\tau_{i \rightarrow j}$  values over all dipoles and individuals range from  $-0.08$  to  $0.36$ .

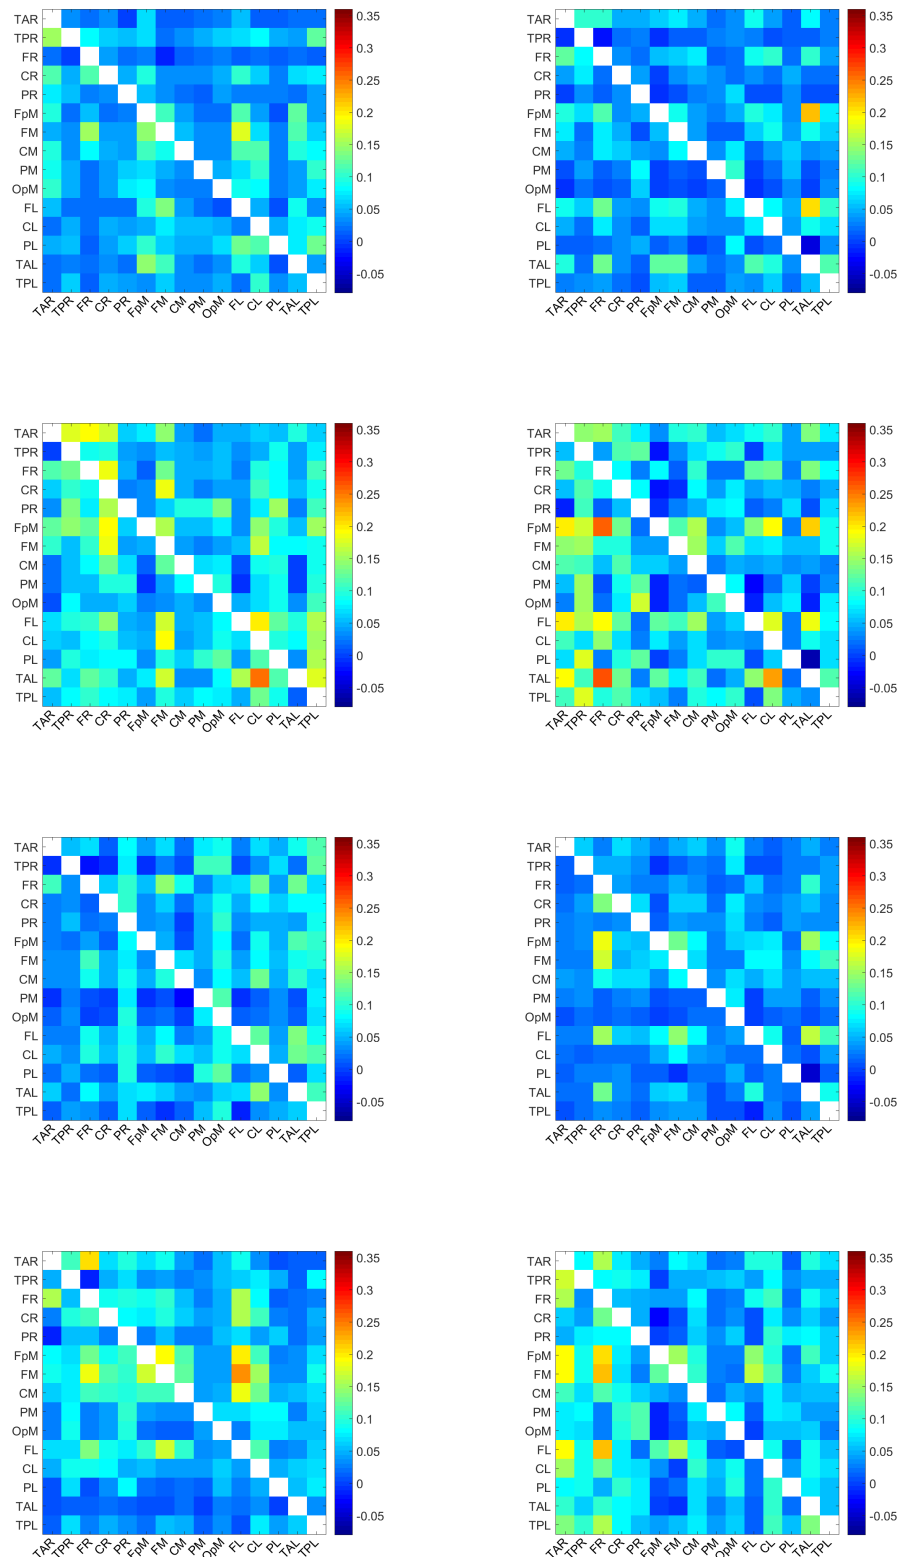

**Figure 6.** Map of  $\tau_{i \rightarrow j}$  values for the individuals 17-24. A uniform color map is used based on the range of  $\tau_{i \rightarrow j}$  values for all 32 individuals. The value of a grid cell (L1, L2), determined by the label L1 on the vertical axis and the label L2 on the horizontal axis, represents information flow from the dipole with label L1 to the dipole with label L2. The  $\tau_{i \rightarrow j}$  values over all dipoles and individuals range from  $-0.08$  to  $0.36$ .

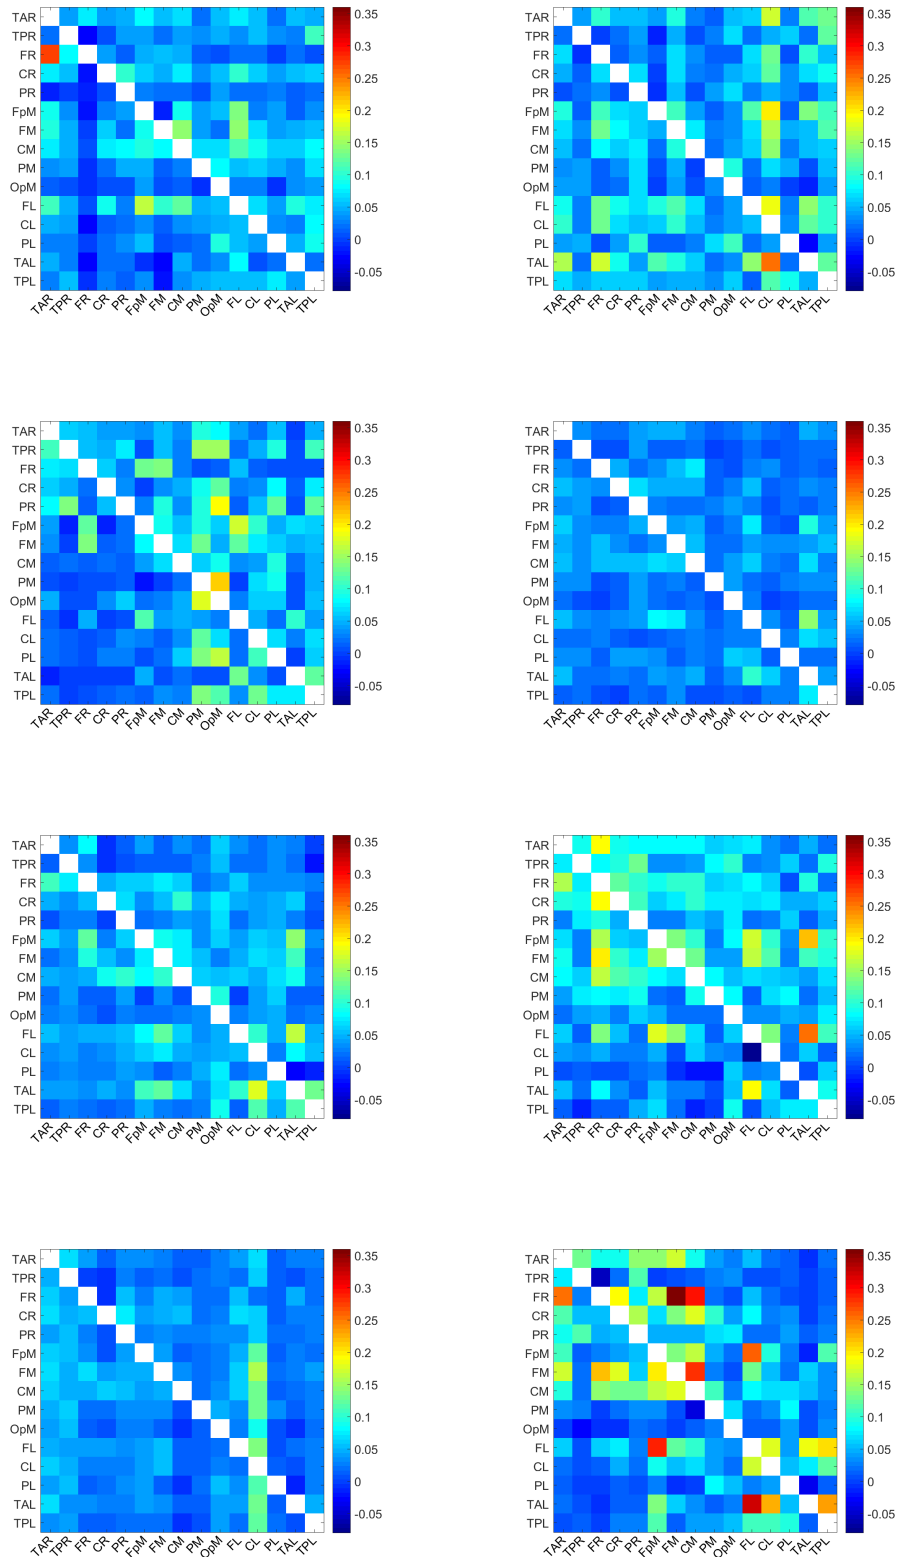

**Figure 7.** Map of  $\tau_{i \rightarrow j}$  values for the individuals 25-32. A uniform color map is used based on the range of  $\tau_{i \rightarrow j}$  values for all 32 individuals. The value of a grid cell (L1, L2), determined by the label L1 on the vertical axis and the label L2 on the horizontal axis, represents information flow from the dipole with label L1 to the dipole with label L2. The  $\tau_{i \rightarrow j}$  values over all dipoles and individuals range from  $-0.08$  to  $0.36$ .

267 based on the full  $\tau_{i \rightarrow j}$  range, i.e.,  $[-0.08, 0.36]$  calculated over all dipole pairs and individuals. We  
268 note that the  $\tau_{i \rightarrow j}$  values are directional. For example, in the second plot (top right) of **Figure 4**, the  
269 cell labeled (TAL, CL) — near the bottom right of the grid — is colored red, which reflects a large  
270 value of  $\tau_{i \rightarrow j}$ , while the cell marked by (CL, TAL) — above the main diagonal of the grid — has a much  
271 lower  $\tau_{i \rightarrow j}$ . This indicates that the information flow from TAL has much higher impact on CL than  
272 the impact of CL on TAL.

273 The maximum  $\tau_{i \rightarrow j}$  observed among individuals is  $\approx 0.36$ . This is about three times higher than  
274 the highest ensemble mean  $\bar{\tau}_{i \rightarrow j}$  which is equal to 0.116 (cf. **Table 1**). This difference reflects the  
275 variability of the information flow rate values between individuals.

### 276 **Effective connectivity variations between individuals**

277 To investigate the variability of the connectivity patterns between individuals, in **Figure 8** we plot  
278 the *frequency of activity*,  $n_{i \rightarrow j}(\tau_c)$ , defined in **Equation 7**, for all  $i \neq j = 1, \dots, 15$  and for  $\tau_c = 0.05$ . The  
279 main features evidenced in this plot are as follows:

- 280 1. Almost all the possible (208 out of 210) *transmitter*  $i \rightarrow$  *receiver*  $j$  inter-dipole connections are  
281 active in at least one individual.
- 282 2. Of the  $210 \times 32 = 6720$  pairs of inter-dipole connections that are available *in total* in the cohort  
283 of 32 individuals, only 2821 connections, or about 42% of the total number, are individually  
284 active (i.e., their magnitude is not less than  $\tau_c = 0.05$ ). This means that more than half of the  
285 current source dipole pairs in the study cohort are not strongly connected. In these pairs, the  
286 *transmitter* dipole does not strongly affect the *receiver* dipole.
- 287 3. In light of (1) and (2), we conclude that the active connections vary to some extent between  
288 individuals. For example, if the same set of about 42% connections were active for all (32)  
289 the individuals in the cohort, approximately 88 (i.e., 42% of 210) dipole pairs would be active.  
290 However, more than twice as many (i.e., 208) show active connections. In particular, 142  
291 inter-dipole connections are active in ten or more individuals, forty inter-dipole connections  
292 (i.e., about 20% of the total connections) are active in twenty or more individuals, and twelve  
293 are active in more than 25 individuals.

294 The connectivity map in **Figure 8** exhibits a denser network of connections than the respective  
295 map in the bottom plot of **Figure 1**. The former shows the number of individuals for which a  
296 particular inter-dipole connection is individually active. Hence, it includes connections that are  
297 active in single individuals. On the other hand, the bottom plot in **Figure 1** displays the number  
298 of connections that are *active on average*, which is understandably smaller given the inter-subject  
299 variability. It is noteworthy that the five connections with the highest mean  $\tau_{i \rightarrow j}$ , i.e., FL→TAL,  
300 FL→FpM, TAL→CL, FM→FR, FL→FM (cf. Figs. **Figure 1** and **Figure 2**, and **Table 1**), have relatively high  
301 frequencies of activity  $n_{i \rightarrow j}(0.05) = 27, 26, 21, 26, 29$  respectively. In other words, these connections  
302 are active in most of the individuals (cf. **Figure 8**).

### 303 **Discussion**

304 In this section we first discuss methodological aspects that are related to the information flow  
305 rate as well as its relation and differences with other connectivity measures. Then, we analyze the

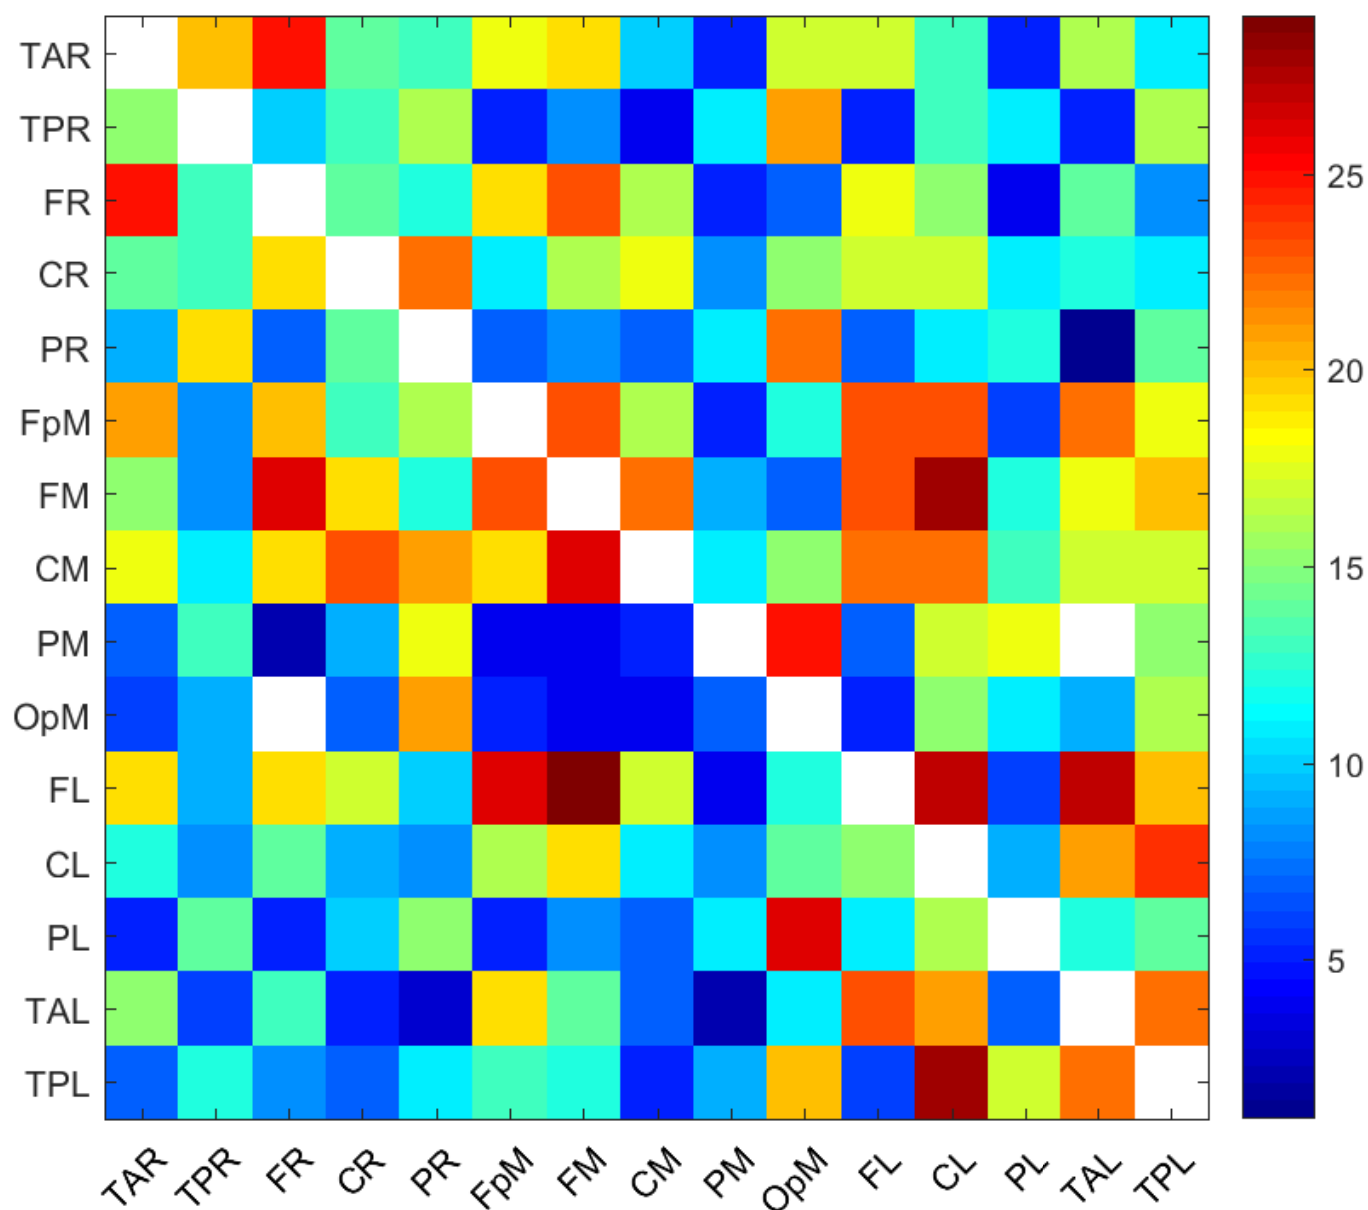

**Figure 8.** Frequency,  $n_{i \rightarrow j}(\tau_c)$ , of active connections (i.e., source current dipole pairs with  $\tau_{i \rightarrow j}$  exceeding in magnitude the threshold value  $\tau_c = 0.05$ ) calculated over all the individuals in the study. The value at each cell corresponds to the number of individuals for whom the specific connection is active. The white areas consist of cells with zero  $n_{i \rightarrow j}(\tau_c)$ , i.e., inactive connections. The diagonal cells are also white, since connections between the same *transmitter* and *receiver* are not meaningful.



306 results that we obtained in this study in the context of the existing literature results on effective  
307 brain connectivity, focusing on the resting state of the adolescent brain.

### 308 **Brain connectivity measures and information flow**

309 Functional measures of connectivity estimate non-directional relations and thus lead to undirected  
310 brain networks that fail to capture how one brain region influences another. However, such  
311 measures are still in common use (*Mill et al., 2017*). The simplest measure of functional connectivity  
312 is Pearson's linear correlation coefficient (*Cohen, 2014*). Pearson's coefficient fails to satisfactorily  
313 capture nonlinear dependence. Mutual information is a measure of functional connectivity that is  
314 based on information theory and can detect both linear and nonlinear relations (*Salvador et al.,*  
315 *2010*). Its calculation, however, requires the univariate probability distribution of each individual  
316 EEG time series, as well as the bivariate (joint) distribution for each pair of time series. Since long  
317 time series are required to estimate the bivariate distribution, the application of mutual information  
318 can be computationally intensive. Moreover, the method is sensitive to the number of bins used  
319 to estimate the probability histograms, and it fails to distinguish between nonlinear and linear, or  
320 positive and negative relations (*Cohen, 2014*).

321 On the other hand, measures of effective connectivity are directional variables which can distin-  
322 guish the direction of information flow between brain regions. Measures of effective connectivity,  
323 such as *Granger causality* (*Kamiński et al., 2001; Hesse et al., 2003; Bressler and Seth, 2011; Seth*  
324 *et al., 2015*) and *transfer entropy* (*Schreiber, 2000; Liu and Aviyente, 2012; Salvador et al., 2010;*  
325 *Shovon et al., 2014; Hillebrand et al., 2016*), have been applied to EEG data to identify patterns of  
326 information flow in the functional brain networks during cognitive activity. Recently, *Muthuraman*  
327 *et al. (2015)* applied *renormalized partial directed coherence*, a measure based on the principle of  
328 Granger causality, to the combination of EEG and magnetoencephalography (MEG) signals to iden-  
329 tify the direction of information flow between two signals and ultimately characterize the functional  
330 and effective connectivity in resting-state brain connectivity patterns. Thus, effective connectivity  
331 measures offer insights into the dynamics of the neuronal clusters that underpin cognitive function.  
332 Graphical models provide an intuitive tool for analyzing and visualizing associations and causal  
333 relationships and for modelling functional connectivity between brain regions (*Li and Wang, 2009*).

334 Granger causality analysis is based on the assumptions that (1) the time series are stationary, (2)  
335 interaction between the series can be described by means of a linear relation (typically a multivariate  
336 autoregressive model), (3) a specific model order can be defined, which determines how far in the  
337 past the coupling between two series extends, and (4) the innovation process of the linear model is  
338 described by Gaussian white noise (*Seth, 2007; Liu and Aviyente, 2012; Cohen, 2014*). This “plain  
339 vanilla” variety of Granger causality fails to detect nonlinear causal links (*Liu and Aviyente, 2012;*  
340 *Lin et al., 2017*). In such cases, nonlinear extensions of Granger causality are necessary (*Chen et al.,*  
341 *2004; Marinazzo et al., 2011*). However, such approaches are not yet conclusive since the selection  
342 of the degree of model nonlinearity and overfitting remain open issues (*Marinazzo et al., 2011*).

343 Transfer entropy is an extension of the concept of mutual information. It is based on the  
344 notion of relative entropy (also known as Kullback–Leibler divergence) and measures the difference  
345 between two probability distributions. For linear autoregressive systems driven by Gaussian white

346 noise, Granger causality has been shown to be equivalent to transfer entropy (**Barnett et al., 2009**;  
347 **Liu and Aviyente, 2012**). Hence, the latter can be viewed as an extension of the former that can  
348 handle the dependence of non-Gaussian time series. Comparisons between Granger causality and  
349 transfer entropy are given in (**Bressler and Seth, 2011**; **Liu and Aviyente, 2012**). As stated above,  
350 Granger causality requires the specification of the order of the autoregressive processes involved.  
351 This model order, however, may depend on a number of variables including the conditions, the  
352 tasks executed (for task-oriented studies), and the EEG time series segments analyzed (**Cohen, 2014**).  
353 Transfer entropy makes fewer assumptions about the data than the standard Granger causality  
354 approach (**Vicente et al., 2011**). There are, nonetheless, challenges related to the calculation of  
355 transfer entropy, e.g., estimation by state-space partitioning, as discussed by **Bressler and Seth**  
356 (**2011**) and **Liang (2014)**.

357 Entropy and information content are key concepts in the definition of functional and effective  
358 brain connectivity measures (**Cohen, 2014**). In the thermodynamic sense, entropy is associated  
359 with disorder: a higher temperature implies higher entropy. In classical (as opposed to quantum  
360 mechanical) thermodynamics, the entropy  $S$  is calculated by means of the Gibbs formula  $S =$   
361  $-k_B \sum_i p_i \ln p_i$ , where the summation is over the probabilities  $p_i$  of the system's microstates (the  
362 index  $i$  should not be confused with the location index of current source dipoles) and  $k_B$  is  
363 Boltzmann's constant. In information theory, the entropy of a system with  $N$  states is defined in  
364 terms of Shannon's formula  $H = -\sum_{i=1}^N p_i \ln p_i$ , where  $p_i$ ,  $i = 1, \dots, N$  is the probability of the state  
365 indexed by  $i$ . If the natural logarithm is used in the definition (as was done above), Shannon entropy  
366 is measured in terms of *natural information units (nats)*.

367 The Shannon entropy quantifies the unpredictability (uncertainty) of a stochastic system. High  
368 entropy implies that the result of a measurement is not only *a priori* unpredictable, but that the  
369 measurement itself provides new information which improves our knowledge of the system. On  
370 the other hand, low entropy means that the extant knowledge of the system allows us to predict  
371 quite well the outcome of the measurement and consequently, the measurement does not contain  
372 significant new information. Hence, higher entropy implies a higher level of unpredictability, while  
373 lower entropy implies that efficient, "compressed" representations are possible (i.e., a parameter  
374 set of lower dimensionality can be used to represent the system). In complex systems, there  
375 are interactions between different components. We can intuitively view information flow from  
376 component  $X$  to component  $Y$  as the amount of the uncertainty of  $Y$  that is resolved by the past  
377 states of  $X$ . If the past states of the component  $X$  do not affect the current state of  $Y$ , there is  
378 no information flow from  $X$  to  $Y$  (**Bossomaier et al., 2016**). On the other hand, the past states  
379 of  $X$  may reduce or improve the predictability of  $Y$ , thus implying information flow from  $X$  to  $Y$ .  
380 Currently used measures of functional and effective brain connectivity are based on the concept of  
381 the absolute Shannon entropy. The concept of Shannon entropy has been generalized to dynamical  
382 systems that are not necessarily stochastic, by means of the Kolmogorov-Sinai entropy (**Gutzwiller,**  
383 **1990**) which quantifies the unpredictability of future states of the system.

384 The *Liang-Kleeman* information flow rate is a recently developed measure which is also based  
385 on the concept of Shannon entropy (**Liang, 2008, 2013b,a, 2014**). However, the information flow  
386 formalism can be derived using either absolute or relative entropy. In two dimensions (i.e., for a

387 system of two time series) this was shown by *Liang (2013b, 2014)*. *Relative entropy* (Kullback–Leibler  
388 divergence) measures how much information is added to a given system with respect to the  
389 information contained in the initial probability distribution. Recently, *Liang (2018)* has shown that  
390 the relative entropy formulation of the information flow rate is also valid for stochastic dynamical  
391 systems with  $N > 2$  dimensions (i.e., systems involving  $N$  potentially coupled time series, where  $N$   
392 is an arbitrary integer value).

393 The information flow rate formulation is based on the theory of dynamical systems, in contrast  
394 with transfer entropy which is a statistically motivated measure of information transfer. The infor-  
395 mation flow rate aims to address the computational shortcomings of transfer entropy (requirement  
396 for long time series, computational complexity, estimation of bivariate probability distribution)  
397 as well as spurious causal associations (*Liang, 2016*). The information flow rate provides an easy-  
398 to-compute *directional (asymmetric)* measure of dependence between pairs of time series that  
399 can be evaluated from a single realization of each series and does not require the estimation  
400 of transition probabilities. Unlike Granger causality, the information flow rate concept does not  
401 require a specific model structure, Gaussian statistics, or stationarity (*Liang, 2015*) and can also be  
402 applied to deterministic nonlinear systems (*Liang, 2016*). These could be important advantages  
403 of information flow, since the EEG signals exhibit non-stationary features evidenced in transitions  
404 between quasi-stationary periods and nonlinear dynamic behavior (*Blanco et al., 1995; Kaplan*  
405 *et al., 2005; Klonowski, 2009*), while the correct model structure is never known *a priori*. However,  
406 further study is needed to compare in detail the performance of the information flow rate against  
407 the standard methods of assessing brain connectivity.

408 Finally, we draw attention to an ongoing discussion in the literature regarding the very definition  
409 of *effective connectivity*, e.g. (*Lindquist, 2008*). Friston argues that effective connectivity should be  
410 based on dynamic models, such as the Dynamic Causal Models (DCMs) (*Friston, 2011*). Model-based  
411 connectivity methods assume a well-defined biophysical model of neuronal dynamics (*Sakkalis,*  
412 *2011*). Friston also opines that data-driven models, such as Granger causality, provide functional  
413 connectivity measures, a view that is echoed by *Bastos and Schoffelen (2015)*. On the other hand,  
414 several other publications referenced in this paper, including the reviews (*Sakkalis, 2011; Bastos*  
415 *and Schoffelen, 2015*), refer to causality-based methods, including data-driven methods such as  
416 Granger causality and transfer entropy, as effective connectivity measures. We follow the latter  
417 viewpoint, according to which the information flow rate is an effective connectivity measure.

## 418 **Comparison of brain connectivity results with literature**

419 In recent years, a number of advances facilitating the study of functional connectivity of the brain  
420 have thoroughly transformed our understanding of the activity present in the brain in absence of  
421 “any imposed stimuli, task performance or other behaviourally salient events” [for a review, see (*Sny-*  
422 *der and Raichle, 2012*)]. This “resting state” of the brain is characterized by spontaneous, coherent  
423 fluctuations of blood-oxygen-level-dependent (BOLD) as well as electromagnetic signals from func-  
424 tionally distinct brain regions. fMRI studies were the first to show that subsets of these regions tend  
425 to act in concert, giving rise to functionally relevant “resting-state” brain networks (*Raichle et al.,*  
426 *2001; Greicius et al., 2009*) that provide a basis for information processing and coordinated activity.

427 More recently, *Yuan et al. (2016)* and *Liu et al. (2017)* have found that functional resting-state  
428 networks can also be extracted from source-space EEG data, and *Hillebrand et al. (2016)* have done  
429 the same using MEG data. The most commonly reported resting-state functional networks observed  
430 in children (*Muetzel et al., 2016*), adolescents (*Borich et al., 2015*) and adults (*Yuan et al., 2016*;  
431 *Liu et al., 2017*) (and references therein) include the visual, the fronto-parietal, the sensory motor  
432 and the default mode network (DMN). These studies also highlight that the above resting-state  
433 functional networks are not independent, and that there is a high degree of interconnections  
434 between them. To date, however, very few studies have investigated the information flow between  
435 the different networks.

436 To our knowledge, there are only three studies that have investigated the source space informa-  
437 tion flow pathways in adults (age: over 20 years) during eyes closed resting state, and considered  
438 the relationship between these pathways and the underlying functional networks: (1) *Michels*  
439 *et al. (2013)* study EEG data using the partial directed coherence (PDC) measure, which is based on  
440 Granger causality, to quantify effective connectivity; (2) *Muthuraman et al. (2015)* analyze both EEG  
441 and MEG data, also by means of the partial directed coherence (PDC) measure; and (3) *Hillebrand*  
442 *et al. (2016)* study MEG recordings using directed phase transfer entropy (dPTE) to assess effective  
443 connectivity. All three studies find that the dominant pattern in adults is a posterior to anterior  
444 flow, originating in the regions associated with the primary visual cortex and the posterior DMN,  
445 and flowing to the frontal regions. *Michels et al. (2013)* and *Muthuraman et al. (2015)* observe only  
446 one-way connectivity between the brain regions. However, *Hillebrand et al. (2016)* find that the  
447 dominant patterns are complemented by weaker anterior to posterior connections which make the  
448 flow bidirectional at finer connection strength resolution.

449 Only *Michels et al. (2013)* have investigated source-space resting-state directed connectivity in  
450 children (mean age: 10 years). They find that the dominant flow pattern is opposite to that observed  
451 in the adults, with activation originating in the anterior (i.e. pre-frontal) regions and terminating in  
452 the posterior (parietal/occipital) regions. One possible explanation is that the anterior to posterior  
453 flow in children indicates modulation of lower-order sensory-motor information from frontal  
454 regions (*Emberson et al., 2015*; *Taylor and Khan, 2000*). Admittedly, there are obvious gaps in our  
455 understanding of the resting-state dynamics over the course of development. More studies of  
456 the resting-state dynamics in children, as well as detailed comparisons with other populations at  
457 different stages of development are needed to fully contextualize these findings.

458 The present study provides the first critical step towards understanding information flow in  
459 the brain during a key transition stage between childhood and adulthood. We have analyzed  
460 resting-state EEG data from an intermediate population, a cohort of adolescents (mean age: 16  
461 years). Using the Liang-Kleeman information flow rate as a measure of effective brain connectivity,  
462 we find that of the 30 *active* connections in adolescent brains (based on the ensemble means of the  
463 normalized information flow rate), the five strongest (cf. red arrows in *Figure 2a*) mostly originate  
464 in the left frontal region of the brain and flow to left temporal and mid-frontal regions. Including  
465 the next ten connections (cf. yellow and dark green arrows in Figs. *Figure 2b* and *Figure 2c*) extends  
466 the active areas of the brain beyond the frontal region to encompass adjacent posterior regions  
467 (i.e., central and temporal), with the information flow pattern becoming largely bidirectional but

468 still strongly left lateralized. The final fifteen connections (cf. light green arrows in **Figure 2d**)  
469 are characterized by information flows between mainly the left and mid anterior regions. They  
470 also show some slightly lower level activity on the right side of the brain, an indication of inter-  
471 hemispheric flow between the left and right frontal regions, and the emergence of connections in  
472 the posterior regions (i.e. parietal to occipital). Overall, the information flow pattern suggested  
473 by the thirty connections is highly left lateralized and comprises mostly short and medium range  
474 bidirectional connections that link the frontal, central and temporal regions of the brain.

475 The above results are reminiscent of the basic directed connectivity pattern observed by **Michels**  
476 **et al. (2013)** in young children but with one important difference. In early adolescence, the pattern  
477 of information flow manifests an additional layer of complexity indicated by bidirectional com-  
478 munication between brain regions that **Hillebrand et al. (2016)** observe in the adults and which  
479 they interpret as feedback loops. In effect, the pattern that we observe in our cohort suggests a  
480 progression towards maturation of the adolescent brain.

481 Similarly, the lateralization of the information flow we observe is also a reflection of an earlier  
482 developmental stage. **Agcaoglu et al. (2015)** studied individuals ranging from 12 to 71 years and  
483 observed that the resting-state networks of young individuals are highly lateralized, with the default  
484 mode network, attention and frontal networks being strongly left lateralized. With age, however,  
485 this lateralization decreases and the network becomes more symmetric. In fact, the degree of  
486 interaction between networks, the order in which the networks are activated, the organization and  
487 the strength of the interactions within individual networks (including the extent to which they are  
488 lateralized), all change over development (**Muetzel et al., 2016**).

489 The fact that both functional and effective connectivity changes as the brain matures is not  
490 entirely surprising. It is well known that the brain undergoes considerable structural changes during  
491 the transition from puberty to adulthood (**Shaw et al., 2008**) as manifested by significant increase  
492 (decrease) in the volume of white (grey) matter (**Gogtay et al., 2004; Paus, 2005; Toga et al., 2006;**  
493 **Lebel and Beaulieu, 2011**). For example, **Lebel and Beaulieu (2011)** have shown that while the  
494 maturation of the projection fibers linking the primary sensorimotor cortical regions with lower-  
495 order subcortical sensory areas and the commissural fibers connecting the two hemispheres of the  
496 brain is mostly complete by late adolescence, the maturation of the association tracts, particularly  
497 the superior longitudinal and fronto-occipital fasciculi that connect the occipital and the frontal  
498 regions of the brain, continues well into the twenties. Functionally, these long association fibers are  
499 correlated with increasing long-range EEG coherence and synchronization (**Miskovic et al., 2015**).

500 Finally, we have also identified significant variability of effective connectivity between individuals  
501 based on the patterns of information flow rate between brain regions. We have presented and  
502 discussed graphical tools for visualizing and characterizing variability between individuals including  
503 dipole-dipole connectivity plots that account for all the individuals in the cohort, e.g., **Figure 8**. The  
504 variability of the brain's resting-state functional and effective connectivity across individuals and  
505 over time are topics of considerable interest within both research and clinical settings. **Hutchison**  
506 **et al. (2013)** and **Hirayama et al. (2016)** (see also references therein) argue that the variability of  
507 the connectivity matrix between individuals is not due to noise but is associated with individual  
508 variances in mental/vigilance states and cognitive function. They also note that there are reports

509 of the temporal dynamics of the connectivity matrix being affected by brain health, which raises  
510 the exciting possibility that, in the future, the associated features could serve as disease/injury  
511 biomarkers. The significant advantages of the new data-driven measure of effective brain connectiv-  
512 ity discussed in this paper (i.e., ease of calculation, sensitivity to both linear and nonlinear relations,  
513 independence from a specific model structure and the stationarity assumptions), make it especially  
514 well suited for exploring these exciting new directions.

## 515 **Materials and Methods**

516 In this section we briefly describe the EEG dataset. We then present the Liang-Kleeman directional  
517 information flow rate that will be used for the analysis of resting-state EEG brain connectivity. We  
518 also discuss how to numerically calculate and evaluate the statistical significance of the information  
519 flow rate obtained from the EEG data.

## 520 **Ethics Statement**

521 This study was approved by the University of British Columbia Clinical Research Ethics Board  
522 (Approval number: H17-02973). The adolescents' parents gave written informed consent for their  
523 children's participation under the approval of the ethics committee of the University of British  
524 Columbia and in accordance with the Helsinki declaration. All participants provided assent.

## 525 **Participants**

526 Thirty-two (32) right-handed male adolescents (mean age: 15.8 yrs; SD:  $\pm 1.3$ ) participated in this  
527 study. Exclusion criteria for all individuals included focal neurologic deficits, pathology and/or those  
528 on prescription medications for neurological or psychiatric conditions. Parents signed an informed  
529 consent form that was approved by the University of British Columbia and all participants provided  
530 assent.

## 531 **Description of EEG data**

532 Between 5–8 minutes of resting-state EEG data were collected while participants had their eyes  
533 closed, using a 64-channel Hydrogel Geodesic SensorNet (EGI, Eugene, OR) connected to a Net Amps  
534 300 amplifier (*Virji-Babul et al., 2014*). The sensor-space signals were referenced to the vertex (Cz)  
535 and recorded at a sampling rate of  $f_s = 250$  Hz. The scalp electrode impedance values were typically  
536 less than  $50\text{ k}\Omega$ . To eliminate artifacts associated with attaching (removing) the cap, 750 data points  
537 were removed from the beginning (end) of each time series. (This corresponds to removing data  
538 with a total duration of 6s.) The EEG time series were then filtered using a band-pass filter (4–50 Hz)  
539 and a notch filter (60 Hz), as described in (*Porter et al., 2017*) [see also (*Rotem-Kohavi et al., 2014,*  
540 *2017*)], to remove signal drift and line noise. In addition, Independent Component Analysis (ICA)  
541 was used to identify, decompose and remove eye blinks. Finally, the data were visually inspected  
542 and epochs with motion as well as additional ocular artifacts were excluded, as were channels with  
543 excessive noise. Each of the resulting EEG series used in this study involves between 67,845 and  
544 114,304 time points.

545 Next, we used the Brain Electrical Analysis (BESA) Version 6.3 software<sup>1</sup> (MEGIS Software GmbH,

<sup>1</sup><http://www.besa.de>

546 Gräfelting, Germany) to map the cleaned sensor-space data to source waveforms. The voltages from  
547 the available sensor channels were first interpolated to voltages at 81 predefined scalp locations  
548 that comprise BESA's Standard-81 10-10 Virtual Montage (*BESA Wiki, 2018*) and re-referenced to  
549 the average reference by subtracting the mean voltage of the full set of 81 virtual scalp electrodes.  
550 BESA uses spherical splines interpolation to perform this mapping (*Perrin et al., 1989; Scherg  
551 et al., 2002*). The interpolation offers a consistent way of dealing with occasional bad channels  
552 while maintaining a common montage across all the individuals. Thereafter, we use the BESA  
553 montage method (*Scherg et al., 2002*) to compute source waveforms. Since resting-state activity  
554 is not localized, we used the BR\_Brain Regions montage which is derived from 15 pre-defined  
555 regional sources that are symmetrically distributed over the entire brain. The respective brain  
556 regions involved in this montage are listed in Table 2 and shown in *Figure 2*. BESA uses a linear  
557 inverse operator of the lead field matrix, which accounts for the topography of the sources included  
558 in the BR\_Brain Regions montage, to calculate the source waveforms (*Scherg et al., 2002*). The  
559 composite source activity in each brain region is represented by a single regional source. Each  
560 source is modeled as a current dipole whose moment is specified in terms of a *local* orthogonal  
561 coordinate system with basis vectors commonly labelled as radial (r), horizontal (h), and vertical  
562 (v). Thus, the source waveforms represent time series of the fifteen current dipoles. Finally, the  
563 resulting data were exported to MATLAB for the analysis described below.

#### 564 **Definition of inter-dipole information flow rate**

565 In the following,  $p_i^{(l)}(t_n)$  will denote the time series quantifying the time-varying strength (magnitude)  
566 of the current dipole moment at the source location  $i$  (where  $i = 1, \dots, N_s = 15$ ) for the individual  
567 indexed by  $l$  (where  $l = 1, \dots, L = 32$ ), at time  $t_n = n \Delta t$ , where  $n = 1, \dots, N$  is the time index and  
568  $\Delta t = 4\text{ms}$  is the *time step*. In terms of the dipole moment components  $(r_i^{(l)}(t_n), h_i^{(l)}(t_n), v_i^{(l)}(t_n))$  in the  
569 local  $(r, v, h)$  system, the magnitude of the dipole moment is given by

$$p_i^{(l)}(t_n) \equiv \sqrt{[r_i^{(l)}(t_n)]^2 + [h_i^{(l)}(t_n)]^2 + [v_i^{(l)}(t_n)]^2},$$

570 For completeness, we note that in general both the strength and the orientation of the current  
571 dipoles vary with time; however, in the present study, we track only their strength. In addition, we  
572 drop the individual index  $l$  if there is no risk of confusion. For short, we will also write  $p_{i,n} = p_i(t_n)$ .

573 Unlike the Pearson correlation coefficient which satisfies  $-1 \leq \hat{r}_{i,j} \leq 1$  due to Schwartz's inequality,  
574 the magnitude of the coefficient  $\hat{r}_{i,dj}$  is not constrained to be less than one. This is due to the  
575 normalization of  $\hat{r}_{i,dj}$  by the standard deviation of  $p_j$  instead of the standard deviation of the  
576 temporal derivative  $dp_j/dt$  (cf. *Equation 3*).

577 Based on the discussion of Shannon entropy (cf. Discussion section), a positive (negative) rate  
578 of information flow from  $i \rightarrow j$  ( $T_{i \rightarrow j}$ ) indicates that the interaction between the two series leads  
579 to an increase (decrease) in the entropy of the series  $p_j$ . Equivalently, it signifies that the *receiver*  
580 series becomes more (less) unpredictable due to its interaction with the *transmitter* series. The  
581 predictability of each time series is negatively correlated with the entropy.

597 While the information flow rate coefficients  $T_{i \rightarrow j}$  were initially formulated for bi-variate systems  
598 that involve two interacting time series, Liang has recently proved theoretically that the equations

582 **Box 3. The main properties of the information flow rate  $T_{i \rightarrow j}$  are as**  
583 **follows:**

- 585 1. In general, the correlation coefficients between  $\hat{r}_{i,dj}$  are not symmetric under interchange  
586 of  $i$  and  $j$ , i.e.,  $\hat{r}_{i,dj} \neq \hat{r}_{j,di}$ . The asymmetry of  $\hat{r}_{i,dj}$  with respect to the interchange of  $i$  and  $j$   
587 introduces directionality in the information flow rate coefficients, which implies that, in  
588 general,  $T_{i \rightarrow j} \neq T_{j \rightarrow i}$ .
- 589 2. For  $i = j$ , in light of  $\hat{r}_{i,i} = 1$  both the numerator and the denominator on the right-hand  
590 side of **Equation 1** become zero. Thus,  $T_{i \rightarrow i}$  is undetermined; however, this is not an issue,  
591 because the quantities of interest are the rates of information flow between different  
592 time series.
- 593 3. The presence of the coefficients  $\hat{r}_{i,dj}$  and  $\hat{r}_{j,di}$  in the numerator on the right-hand side  
594 of **Equation 1** implies that  $T_{i \rightarrow j}$  is proportional to the inverse of the finite difference  
595 time step, i.e.,  $\propto 1/k\Delta t$ , where  $k\Delta t$  is the time step used to calculate the time derivative  
596 (cf. **Equation 4.**)

599 above are also valid for  $N$ -variate, deterministic or stochastic systems (**Liang, 2016, 2018**). In  
600 addition, even though the estimator of  $T_{i \rightarrow j}$  has been derived using the assumption of a linear  
601 system, it has been successfully applied to identify causal connections in nonlinear systems as  
602 well (**Liang, 2014, 2016**).

603 **Normalized information flow rate**

628 The information flow rate is based on the notion of information entropy. A positive  $T_{2 \rightarrow 1}$  implies  
629 that the *transmitter* series  $p_2$  increases the entropy of the *receiver*  $p_1$ , while a negative  $T_{2 \rightarrow 1}$  implies  
630 the opposite. By comparing  $T_{i \rightarrow j}$  with  $T_{j \rightarrow i}$  (in the latter the roles of *transmitter* and *receiver* are  
631 reversed), we can determine which series transfers more information to the other series. However,  
632 this comparison does not reveal which of the two series is affected more due to its interaction  
633 with the other, because the coefficient does not account for the entropy change of each series due  
634 to the intrinsic evolution and possible stochastic effects. In order to quantify the impact of the  
635 entropy transferred to the *receiver* from a *transmitter* series, we need to know the extent to which  
636 the information transfer affects the predictability of the *receiver*, relative to all the other influences  
637 acting on the *receiver*.

638 The total rate of entropy change of  $p_j$  (*receiver*) depends not only on the information flow from  $p_i$   
639 (*transmitter*), which is determined by the rate  $T_{i \rightarrow j}$ , but also on  $dH_j^*/dt$  and  $dH_j^s/dt$ . The term  $dH_j^*/dt$   
640 (*intrinsic entropy rate*) represents the entropy rate of change due to the change of the phase space  
641 in the direction  $p_j$ . The term  $dH_j^s/dt$  (*noise-induced entropy rate*) represents the impact of stochastic  
642 effects in the dynamical system that underlies the evolution of  $p_j$  (**Liang, 2008**). Hence, as proposed  
643 by **Liang (2015)**, a suitable normalization factor for the information flow rate from  $p_i$  to  $p_j$  is derived  
644 by adding the absolute values of the three rates that contribute to the total rate of entropy change  
645 of the *receiver*  $p_j$ , i.e.,



- 604 **Box 4. The main properties of the *normalized information flow rate*  $\tau_{i \rightarrow j}$**   
605 **are as follows:**
- 607 1. The coefficient  $\tau_{i \rightarrow j}$  is, in general, asymmetric, i.e.,  $\tau_{i \rightarrow j} \neq \tau_{j \rightarrow i}$  for  $i \neq j$ .
  - 608 2. The  $\tau_{i \rightarrow j}$  can take negative or positive values with magnitude less than one, i.e.,  $-1 \leq \tau_{i,j} \leq$   
609 1. Positive values of  $\tau_{i \rightarrow j}$  imply that the *transmitter*  $p_i$  tends to increase the entropy of the  
610 *receiver*  $p_j$  (i.e., it increases its uncertainty), while negative values imply that  $p_i$  reduces  
611 the entropy of  $p_j$ .
  - 612 3. The  $\tau_{i \rightarrow j}$  does not explicitly depend on the finite difference step  $k\Delta t$ . This is due to the  
613 fact that both the numerator and the denominator in **Equation 9** are proportional to  
614  $1/k\Delta t$ .
  - 615 4. The  $\tau_{i \rightarrow j}$  measures the relative importance of the entropy change in the *receiver* series  
616  $p_j$  due to its interaction with the *transmitter*  $p_i$ . The impact of  $p_i$  on  $p_j$  increases with the  
617 magnitude of  $\tau_{i \rightarrow j}$ .
  - 618 5. The  $\tau_{i \rightarrow j}$  is a relative measure which quantifies the information transfer from  $p_i$  to  $p_j$  with  
619 respect to the endogenous and noise-induced changes of the latter. However, it cannot  
620 be used to compare the information flow rate from  $p_i$  to  $p_j$  with that from  $p_j$  to  $p_i$ . This is  
621 due to the fact that the normalization of  $\tau_{i \rightarrow j}$  depends on the entropy changes of  $p_j$ , while  
622 the normalization of  $\tau_{j \rightarrow i}$  depends on the entropy changes of  $p_i$ . The comparison of the  
623 reverse information flows between  $p_i$  and  $p_j$  should thus be based on the non-normalized  
624 coefficients  $T_{i \rightarrow j}$  and  $T_{j \rightarrow i}$  (**Liang, 2015**).
  - 625 6. The information flow rates (normalized and non-normalized) can be calculated without  
626 requiring (i) the estimation of conditional probability distributions (ii) stationarity assump-  
627 tions (iii) Gaussian distribution of the fluctuations or (iv) a specific model structure.

$$Z_{i \rightarrow j} \equiv |T_{i \rightarrow j}| + \left| \frac{dH_j^*}{dt} \right| + \left| \frac{dH_j^s}{dt} \right|. \quad (8)$$

646 Based on **Equation 8**,  $Z_{i \rightarrow j}$  is a non-negative number bounded from below by  $|T_{i \rightarrow j}|$ . In addition,  
647  $Z_{i \rightarrow j}$  cannot be zero unless the rate of change of the intrinsic and stochastic entropy components  
648 are zero. This can only happen if  $p_j$  is constant in time, which is not relevant for the EEG time  
649 series. Thus, the *normalized information flow rate* from the *transmitter*  $p_i$  to the *receiver*  $p_j$  is defined  
650 as (**Liang, 2015**)

$$\tau_{i \rightarrow j} = T_{i \rightarrow j} / Z_{i \rightarrow j}. \quad (9)$$

651 According to **Equation 9**,  $\tau_{i \rightarrow j}$  measures the percentage of the total entropy rate of change for  $p_j$   
652 which is due to its interaction with  $p_i$ . The calculation of the terms which contribute to  $Z_{i \rightarrow j}$  from  
653 the data is explained in Appendix 1.

654 Based on the above analysis, the normalized information flow rate,  $\tau_{i \rightarrow j}$ , has several advantages  
655 over the un-normalized coefficient,  $T_{i \rightarrow j}$ , the most important being that (1)  $\tau_{i \rightarrow j}$  does not explicitly  
656 depend on the finite difference step (item 3 in **Box 4**), and (2) it measures the importance of  
657 information flow from the *transmitter* to the *receiver* (items 4 and 5 in **Box 4**). Hence,  $\tau_{i \rightarrow j}$  is a suitable  
658 measure for investigating patterns of information flow between different regions of the brain and  
659 therefore for assessing effective connectivity.

### 660 **Non-parametric testing of normalized information flow rate**

661 To calculate  $\tau_{i \rightarrow j}$  for each individual  $l = 1, \dots, L$ , we use all the time points in the series  $\{p_i^{(l)}(t_n)\}_{n=1}^{N_l}$ , for  
662 the source locations  $i = 1, \dots, 15$ . Each series represents the strength of the current dipole moment  
663 at location  $i$ . All the time series for the same individual (indexed by  $l$ ) have the same length  $N_l$   
664 which varies between 67845 and 114304 points.

665 In order to infer connectivity patterns, it is necessary to know if the estimated values  $\tau_{i \rightarrow j}$  are  
666 statistically significant. Each estimate of an inter-dipole  $\tau_{i \rightarrow j}$  is a statistic, i.e., a random variable that  
667 fluctuates between samples. If the sampling distribution of the statistic is known, the significance  
668 of a particular estimate can be assessed using a suitably constructed parametric statistical test.  
669 In the case of  $T_{i \rightarrow j}$  such a test can be constructed (**Liang, 2014**). For  $\tau_{i \rightarrow j}$ , however, the sampling  
670 distribution is not known. In this case, it is possible to apply *non-parametric permutation testing* in  
671 the spirit used by Lachaux *et al.* to quantify the significance of phase locking values (**Lachaux et al.,**  
672 **1999; Bastos et al., 2015**). The goal of non-parametric permutation testing is to determine the  
673 probability that the observed test statistic could have been realized if the null hypothesis (i.e., zero  
674 information flow) were true. This, in turn, allows us to conclude if an estimated information flow  
675 rate is statistically significant: a very small probability ( $p$ -value) implies that the observed deviation  
676 is not likely under the null hypothesis (**Maris and Oostenveld, 2007; Cohen, 2014**).

677 The test statistic that we use is the normalized information flow rate from series  $p_i$  to series  $p_j$ , for  
678  $i \neq j = 1, \dots, 15$ . The null hypothesis that we test is that there is no information flow between series  
679  $p_i$  and  $p_j$ . We generate  $M_s = 1000$  randomized states  $p'_{i[m]}(t_n)$ , where  $m = 1, \dots, M_s$  and  $n = 1, \dots, N$ ,  
680 from *each* transmitter time series  $p_i$ . Each randomized state is obtained by scrambling (by means of

681 random permutations) the  $N$  time points of  $p_i$ . The permutation destroys the temporal ordering  
682 of  $p_i$  and consequently any patterns of information flow from  $p'_{i[m]}(\cdot)$  to  $p_j(\cdot)$ . Hence, the estimated  
683  $\tau_{i[m] \rightarrow j}$  values based on the shuffled time series  $p_i$  do not represent meaningful information flow.

684 The  $p$ -value of the statistic  $\tau_{i \rightarrow j}$  is defined as the percentage of times — calculated over  $M_s$   
685 permutation states — that the randomized information flow rate  $\tau_{i[m] \rightarrow j}$  is more extreme than  $\tau_{i \rightarrow j}$   
686 (i.e., larger than  $\tau_{i \rightarrow j}$  if  $\tau_{i \rightarrow j} > 0$  and smaller than  $\tau_{i \rightarrow j}$  if  $\tau_{i \rightarrow j} < 0$ ). A high  $p$ -value would indicate that  
687 the null hypothesis cannot be rejected. In contrast, a low  $p$ -value would provide support for the  
688 alternative hypothesis (i.e., that there is significant information flow from  $p_i$  to  $p_j$ ). The observed  
689 value  $\tau_{i \rightarrow j}$  is then considered as statistically significant, if the respective  $p$ -value is below a specified  
690 significance level (typically 0.1%–5%).

691 Based on all the simulations performed for the entire cohort of 32 individuals, we find that  
692 the magnitude of the information flow rates between the randomly permuted *transmitter* current  
693 dipoles and the *receiver* current dipoles are all contained in the interval  $[-5.5, 5.0] \times 10^{-4}$ . Turning to  
694 the inter-dipole information flow rates calculated from the EEG data, we find that all except for 11  
695 out of the  $210 \times 32 = 6720$  dipole pairs show information flow rates outside the above interval. In fact,  
696 the majority of the normalized information flow rates are two orders or more higher in magnitude.  
697 Hence, given the size of the above confidence interval, we can conclude that most of the observed  
698  $\tau_{i \rightarrow j}$  are statistically significant even at the  $p = 0.1\%$  level.

699 The above result indicates a low-level global connectivity linking most of the brain regions in the  
700 resting state. However, small normalized information flow rates, albeit statistically significant, imply  
701 that the contribution of the respective entropy flow rate (information flow) from the *transmitter*  
702 dipole to the *receiver* dipole is very small compared to the intrinsic entropy changes in the *receiver*  
703 dipole. This argument motivates the introduction of an arbitrary threshold that can be used to  
704 count the more important connections.

### 705 **Impact of differencing scheme on connectivity**

706 As stated following the definition of inter-dipole information flow rate, the estimation of the first-  
707 order derivatives is based on finite differences (cf. **Equation 4**). The finite differencing, as shown  
708 in **Equation 4**, can be accomplished by means of different time steps equal to  $k\Delta t$ . Typically,  $k = 1$   
709 or  $k = 2$  is used (**Liang, 2014**). We have conducted our analysis with  $k = 2$ , since this choice tends to  
710 reduce the impact of occasional large spikes (e.g., jumps) in the EEG time series on the information  
711 flow rate. Using a larger value of  $k$  results in effective smoothing of the EEG time series which  
712 encroaches on the upper end of the frequency band that is generally of interest in resting state  
713 studies. Hence, we did not consider values of  $k$  higher than two.

714 We have experimented with synthetic data obtained from the simulation of two coupled stochas-  
715 tic differential equations for which  $T_{i \rightarrow j}$  admits explicit expressions (**Liang, 2014**). We used similar  
716 length  $N = 60000 - 80000$  for the synthetic time series as that of the EEG series and a number of  
717 repetitions equal to the number of individuals in the study ( $L = 32$ ). Our results show practically no  
718 difference between the mean  $T_{i \rightarrow j}$  estimated from the time series whether  $k = 1$  or  $k = 2$  is used.

719 In the case of the source-reconstructed EEG data, we repeated the entire analysis using  $k = 1$ .  
720 This leads to fewer active connections, i.e., 1904 instead of 2821 for  $k = 2$  shown in **Figure 8**. On the

721 other hand, the correlation coefficient between the spatial distribution of the frequency of active  
722 connections  $n_{i \rightarrow j}(0.05)$  for  $k = 1$  and for  $k = 2$  is equal to 0.89. This indicates that the distribution of  
723 active connections is highly correlated between  $k = 1$  and  $k = 2$ . Based on our arbitrary threshold  
724  $\tau_c = 0.05$ , we determine 42 active connections ( $\bar{\tau}_{i \rightarrow j} \geq \tau_c$ ) for the  $k = 1$  scheme versus 92 active  
725 connections for the  $k = 2$  scheme. In spite of the fact that fewer active connections appear for  $k = 1$ ,  
726 the overall pattern of information flow, as delineated by the thirty connections with the highest  $\bar{\tau}_{i \rightarrow j}$ ,  
727 remains unchanged.

## 728 Acknowledgments

729 DTH acknowledges useful electronic correspondence with X. San Liang regarding the definition and  
730 interpretation of the information flow rate coefficient.

## 731 References

- 732 **Agcaoglu O**, Miller R, Mayer AR, Hugdahl K, Calhoun VD. Lateralization of resting state networks and relationship  
733 to age and gender. *NeuroImage*. 2015; 104:310–325. doi: [10.1016/j.neuroimage.2014.09.001](https://doi.org/10.1016/j.neuroimage.2014.09.001).
- 734 **Baccalá LA**, Sameshima K. Partial directed coherence: a new concept in neural structure determination.  
735 *Biological cybernetics*. 2001; 84(6):463–474. doi: [10.1007/PL00007990](https://doi.org/10.1007/PL00007990).
- 736 **Barnett L**, Barrett AB, Seth AK. Granger causality and transfer entropy are equivalent for Gaussian variables.  
737 *Physical Review Letters*. 2009 Dec; 103:238701. doi: [10.1103/PhysRevLett.103.238701](https://doi.org/10.1103/PhysRevLett.103.238701).
- 738 **Bastos AM**, Schoffelen JM. A tutorial review of functional connectivity analysis methods and their interpretational  
739 pitfalls. *Frontiers in Systems Neuroscience*. 2015; 9. doi: [10.3389/fnsys.2015.00175](https://doi.org/10.3389/fnsys.2015.00175).
- 740 **Bastos AM**, Vezoli J, Conrado AB, Schoffelen JM, Oostenveld R, Dowdall JR, De Weerd P, Kennedy H, Pascal F.  
741 Visual areas exert feedforward and feedback influences through distinct frequency channels. *Neuron*. 2015;  
742 85(2):390–401. doi: [10.1016/j.neuron.2014.12.018](https://doi.org/10.1016/j.neuron.2014.12.018).
- 743 **BESA Wiki**, BESA Research Montage Editor; 2018. [http://wiki.besa.de/index.php?title=BESA\\_Research\\_Montage\\_](http://wiki.besa.de/index.php?title=BESA_Research_Montage_Editor#Virtual_Standard_Montages)  
744 [Editor#Virtual\\_Standard\\_Montages](http://wiki.besa.de/index.php?title=BESA_Research_Montage_Editor#Virtual_Standard_Montages), [Online; accessed 31-May-2018].
- 745 **Blanco S**, Garcia H, Quiroga RQ, Romanelli L, Rosso OA. Stationarity of the EEG series. *IEEE Engineering in*  
746 *Medicine and Biology Magazine*. 1995; 14(4):395–399. doi: [10.1109/51.395321](https://doi.org/10.1109/51.395321).
- 747 **Borich M**, Babul AN, Yuan PH, Boyd L, Virji-Babul N. Alterations in resting-state brain networks in concussed  
748 adolescent athletes. *Journal of Neurotrauma*. 2015; 32(4):265–271. doi: [10.1089/neu.2013.3269](https://doi.org/10.1089/neu.2013.3269).
- 749 **Bossomaier T**, Barnett L, Harré M, Lizier JT. *An Introduction to Transfer Entropy: Information Flow in Complex*  
750 *Systems*. Cham, Switzerland: Springer; 2016.
- 751 **Bressler SL**, Seth AK. Wiener–Granger causality: A well established methodology. *NeuroImage*. 2011; 58(2):323–  
752 329. doi: [10.1016/j.neuroimage.2010.02.059](https://doi.org/10.1016/j.neuroimage.2010.02.059).
- 753 **Chen Y**, Rangarajan G, Feng J, Ding M. Analyzing multiple nonlinear time series with extended Granger causality.  
754 *Physics Letters A*. 2004; 324(1):26–35. doi: [10.1016/j.physleta.2004.02.032](https://doi.org/10.1016/j.physleta.2004.02.032).
- 755 **Cohen MX**. *Analyzing Neural Time Series Data: Theory and Practice*. MIT Press; 2014.
- 756 **Ding M**, Chen Y, Bressler SL. Granger Causality: Basic Theory and Application to Neuroscience. In: *Handbook of*  
757 *Time Series Analysis* John Wiley & Sons, Ltd; 2006.p. 437–460. doi: [10.1002/9783527609970.ch17](https://doi.org/10.1002/9783527609970.ch17).

- 758 **Emberson LL**, Richards JE, Aslin RN. Top-down modulation in the infant brain: Learning-induced expectations  
759 rapidly affect the sensory cortex at 6 months. *Proceedings of the National Academy of Sciences*. 2015;  
760 112(31):9585–9590. doi: [10.1073/pnas.1510343112](https://doi.org/10.1073/pnas.1510343112).
- 761 **Fair DA**, Cohen AL, Dosenbach NUF, Church JA, Miezin FM, Barch DM, Raichle ME, Petersen SE, Schlaggar BL.  
762 The maturing architecture of the brain's default network. *Proceedings of the National Academy of Sciences*.  
763 2008; 105(10):4028–4032. doi: [10.1073/pnas.0800376105](https://doi.org/10.1073/pnas.0800376105).
- 764 **Friston KJ**. Functional and effective connectivity: a review. *Brain Connectivity*. 2011; 1(1):13–36. doi:  
765 [10.1089/brain.2011.0008](https://doi.org/10.1089/brain.2011.0008).
- 766 **Friston KJ**. Functional and effective connectivity in neuroimaging: a synthesis. *Human brain mapping*. 1994;  
767 2(1-2):56–78. doi: [10.1002/hbm.460020107](https://doi.org/10.1002/hbm.460020107).
- 768 **Friston KJ**, Harrison L, Penny W. Dynamic causal modelling. *NeuroImage*. 2003; 19(4):1273–1302. doi:  
769 [10.1016/S1053-8119\(03\)00202-7](https://doi.org/10.1016/S1053-8119(03)00202-7).
- 770 **Gogtay N**, Giedd JN, Lusk L, Hayashi KM, Greenstein D, Vaituzis AC, Nugent TF, Herman DH, Clasen LS, Toga  
771 AW, Rapoport JL, Thompson PM. Dynamic mapping of human cortical development during childhood  
772 through early adulthood. *Proceedings of the National Academy of Sciences*. 2004; 101(21):8174–8179. doi:  
773 [10.1073/pnas.0402680101](https://doi.org/10.1073/pnas.0402680101).
- 774 **Greicius MD**, Supekar K, Menon V, Dougherty RF. Resting-state functional connectivity reflects structural  
775 connectivity in the default mode network. *Cerebral Cortex*. 2009; 19(1):72–78. doi: [10.1093/cercor/bhn059](https://doi.org/10.1093/cercor/bhn059).
- 776 **Gutzwiller MC**. *Chaos in Classical and Quantum Mechanics*, vol. 1 of *Interdisciplinary Applied Mathematics*.  
777 New York: Springer; 1990.
- 778 **Hesse W**, Möller E, Arnold M, Schack B. The use of time-variant EEG Granger causality for inspecting di-  
779 rected interdependencies of neural assemblies. *Journal of Neuroscience Methods*. 2003; 124(1):27–44. doi:  
780 [10.1016/S0165-0270\(02\)00366-7](https://doi.org/10.1016/S0165-0270(02)00366-7).
- 781 **Hillebrand A**, Tewarie P, van Dellen E, Yu M, Carbo EWS, Douw L, Gouw AA, van Straaten ECW, Stam CJ. Direction  
782 of information flow in large-scale resting-state networks is frequency-dependent. *Proceedings of the National  
783 Academy of Sciences*. 2016; 113(14):3867–3872. doi: [10.1073/pnas.1515657113](https://doi.org/10.1073/pnas.1515657113).
- 784 **Hirayama J**, Hyvärinen A, Kiviniemi V, Kawanabe M, Yamashita O. Characterizing variability of modular brain con-  
785 nectivity with constrained principal component analysis. *PLoS ONE*. 2016 12; 11(12):1–24. doi: [10.1371/jour-  
786 nal.pone.0168180](https://doi.org/10.1371/journal.pone.0168180).
- 787 **Horwitz B**. The elusive concept of brain connectivity. *NeuroImage*. 2003; 19(2):466–470. doi: [10.1016/S1053-  
788 8119\(03\)00112-5](https://doi.org/10.1016/S1053-8119(03)00112-5).
- 789 **Hutchison RM**, Womelsdorf T, Allen EA, Bandettini PA, Calhoun VD, Corbetta M, Della Penna S, Duyn JH,  
790 Glover GH, Gonzalez-Castillo J, et al. Dynamic functional connectivity: promise, issues, and interpretations.  
791 *NeuroImage*. 2013; 80:360–378. doi: [10.1016/j.neuroimage.2013.05.079](https://doi.org/10.1016/j.neuroimage.2013.05.079).
- 792 **Kamiński M**, Ding M, Truccolo WA, Bressler SL. Evaluating causal relations in neural systems: Granger causality,  
793 directed transfer function and statistical assessment of significance. *Biological Cybernetics*. 2001; 85(2):145–  
794 157. doi: [10.1007/s004220000235](https://doi.org/10.1007/s004220000235).
- 795 **Kaplan AY**, Fingelkurts AA, Fingelkurts AA, Borisov SV, Darkhovsky BS. Nonstationary nature of the brain activity  
796 as revealed by EEG/MEG: Methodological, practical and conceptual challenges. *Signal Processing*. 2005;  
797 85(11):2190–2212. doi: [10.1016/j.sigpro.2005.07.010](https://doi.org/10.1016/j.sigpro.2005.07.010).

- 798 **Klonowski W.** Everything you wanted to ask about EEG but were afraid to get the right answer. *Nonlinear*  
799 *Biomedical Physics.* 2009; 3(1):2. doi: 10.1186/1753-4631-3-2.
- 800 **Lachaux JP, Rodriguez E, Martinerie J, Varela FJ.** Measuring phase synchrony in brain signals. *Human Brain*  
801 *Mapping.* 1999; 8(4):194–208. doi: 10.1002/(SICI)1097-0193(1999)8:4%3C194::AID-HBM4%3E3.0.CO;2-C.
- 802 **Label C, Beaulieu C.** Longitudinal development of human brain wiring continues from childhood into adulthood.  
803 *Journal of Neuroscience.* 2011; 31(30):10937–10947. doi: 10.1523/JNEUROSCI.5302-10.2011.
- 804 **Li J, Wang ZJ.** Controlling the false discovery rate of the association/causality structure learned with the PC  
805 algorithm. *Journal of Machine Learning Research.* 2009 Jun; 10:475–514.
- 806 **Liang XS.** Information flow within stochastic dynamical systems. *Physical Review E.* 2008; 78(3):031113. doi:  
807 10.1103/PhysRevE.78.031113.
- 808 **Liang XS.** The Liang-Kleeman information flow: Theory and applications. *Entropy.* 2013; 15(1):327–360. doi:  
809 10.3390/e15010327.
- 810 **Liang XS.** Local predictability and information flow in complex dynamical systems. *Physica D: Nonlinear*  
811 *Phenomena.* 2013; 248:1–15. doi: 10.1016/j.physd.2012.12.011.
- 812 **Liang XS.** Unraveling the cause-effect relation between time series. *Physical Review E.* 2014; 90(5):052150. doi:  
813 10.1103/PhysRevE.90.052150.
- 814 **Liang XS.** Normalizing the causality between time series. *Physical Review E.* 2015; 92(2):022126. doi:  
815 10.1103/PhysRevE.92.022126.
- 816 **Liang XS.** Information flow and causality as rigorous notions ab initio. *Physical Review E.* 2016; 94(5):052201.  
817 doi: 10.1103/PhysRevE.94.052201.
- 818 **Liang XS.** Causation and information flow with respect to relative entropy. *Chaos: An Interdisciplinary Journal*  
819 *of Nonlinear Science.* 2018; 28(7):075311. doi: 10.1063/1.5010253.
- 820 **Liang XS, Kleeman R.** Information Transfer between Dynamical System Components. *Physica Review Letters.*  
821 2005; 95:244101. doi: 10.1103/PhysRevLett.95.244101.
- 822 **Lin P, Yang Y, Gao J, De Pisapia N, Ge S, Wang X, Zuo CS, Levitt JJ, Niu C.** Dynamic default mode network across  
823 different brain states. *Scientific Reports.* 2017; 7:46088. doi: 10.1038/srep46088.
- 824 **Lindquist MA.** The statistical analysis of fMRI data. *Statistical Science.* 2008; 23(4):439–464. doi: 10.1214/09-  
825 STS282.
- 826 **Liu Q, Farahibozorg S, Porcaro C, Wenderoth N, Mantini D.** Detecting large-scale networks in the human  
827 brain using high-density electroencephalography. *Human Brain Mapping.* 2017; 38(9):4631–4643. doi:  
828 10.1002/hbm.23688.
- 829 **Liu Y, Aviyente S.** Quantification of effective connectivity in the brain using a measure of directed information.  
830 *Computational and Mathematical Methods in Medicine.* 2012; 2012. doi: 10.1155/2012/635103.
- 831 **Marinazzo D, Liao W, Chen H, Stramaglia S.** Nonlinear connectivity by Granger causality. *NeuroImage.* 2011;  
832 58(2):330–338. doi: 10.1016/j.neuroimage.2010.01.099.
- 833 **Maris E, Oostenveld R.** Nonparametric statistical testing of EEG- and MEG-data. *Journal of Neuroscience*  
834 *Methods.* 2007; 164(1):177–190. doi: 10.1016/j.jneumeth.2007.03.024.
- 835 **Marshall WJ, Lackner CL, Marriott P, Santesso DL, Segalowitz SJ.** Using phase shift Granger causality  
836 to measure directed connectivity in EEG recordings. *Brain Connectivity.* 2014; 4(10):826–841. doi:  
837 10.1089/brain.2014.0241.

- 838 **McIntosh AR**, Gonzalez-Lima F. Structural equation modeling and its application to network analysis in  
839 functional brain imaging. *Human Brain Mapping*. 1994; 2(1-2):2–22. doi: [10.1002/hbm.460020104](https://doi.org/10.1002/hbm.460020104).
- 840 **Michels L**, Muthuraman M, Lüchinger R, Martin E, Anwar AR, Raethjen J, Brandeis D, Siniatchkin M. Develop-  
841 mental changes of functional and directed resting-state connectivities associated with neuronal oscillations in  
842 EEG. *NeuroImage*. 2013; 81:231–242. doi: [10.1016/j.neuroimage.2013.04.030](https://doi.org/10.1016/j.neuroimage.2013.04.030).
- 843 **Mill RD**, Bagic A, Bostan A, Schneider W, Cole MW. Empirical validation of directed functional connectivity.  
844 *NeuroImage*. 2017; 146:275–287. doi: [10.1016/j.neuroimage.2016.11.037](https://doi.org/10.1016/j.neuroimage.2016.11.037).
- 845 **Miskovic V**, Ma X, Chou CA, Fan M, Owens M, Sayama H, Gibb BE. Developmental changes in spontaneous  
846 electrocortical activity and network organization from early to late childhood. *NeuroImage*. 2015; 118:237–247.  
847 doi: [10.1016/j.neuroimage.2015.06.013](https://doi.org/10.1016/j.neuroimage.2015.06.013).
- 848 **Muetzel RL**, Blanken LME, Thijsen S, van der Lugt A, Jaddoe VWV, Verhulst FC, Tiemeier H, White T. Resting-  
849 state networks in 6-to-10 year old children. *Human Brain Mapping*. 2016; 37(12):4286–4300. doi:  
850 [10.1002/hbm.23309](https://doi.org/10.1002/hbm.23309).
- 851 **Muthuraman M**, Moliadze V, Mideksa KG, Anwar AR, Stephani U, Deuschl G, Freitag CM, Siniatchkin M. EEG-MEG  
852 integration enhances the characterization of functional and effective connectivity in the resting state network.  
853 *PLoS ONE*. 2015; 10(10):e0140832. doi: [10.1371/journal.pone.0140832](https://doi.org/10.1371/journal.pone.0140832).
- 854 **Paus T**. Mapping brain maturation and cognitive development during adolescence. *Trends in Cognitive Sciences*.  
855 2005; 9(2):60–68. doi: [10.1016/j.tics.2004.12.008](https://doi.org/10.1016/j.tics.2004.12.008).
- 856 **Perrin F**, Pernier J, Bertrand O, Echallier JF. Spherical splines for scalp potential and current density mapping. *Elec-*  
857 *troencephalography and Clinical Neurophysiology*. 1989; 72(2):184–187. doi: [10.1016/0013-4694\(89\)90180-6](https://doi.org/10.1016/0013-4694(89)90180-6).
- 858 **Porter S**, Torres IJ, Panenka W, Rajwani Z, Fawcett D, Hyder A, Virji-Babul N. Changes in brain-behavior relation-  
859 ships following a 3-month pilot cognitive intervention program for adults with traumatic brain injury. *Heliyon*.  
860 2017; 3(8):e00373. doi: [10.1016/j.heliyon.2017.e00373](https://doi.org/10.1016/j.heliyon.2017.e00373).
- 861 **Raichle ME**, MacLeod AM, Snyder AZ, Powers WJ, Gusnard DA, Shulman GL. A default mode of brain function.  
862 *Proceedings of the National Academy of Sciences*. 2001; 98(2):676–682. doi: [10.1073/pnas.98.2.676](https://doi.org/10.1073/pnas.98.2.676).
- 863 **Raichle ME**, Mintun MA. Brain work and brain imaging. *Annual Reviews of Neuroscience*. 2006; 29:449–476.  
864 doi: [10.1146/annurev.neuro.29.051605.112819](https://doi.org/10.1146/annurev.neuro.29.051605.112819).
- 865 **Roebroeck A**, Formisano E, Goebel R. Mapping directed influence over the brain using Granger causality and  
866 fMRI. *NeuroImage*. 2005; 25(1):230–242. doi: <https://doi.org/10.1016/j.neuroimage.2004.11.017>.
- 867 **Rotem-Kohavi N**, Hilderman CGE, Liu A, Makan N, Wang JZ, Virji-Babul N. Network analysis of perception-action  
868 coupling in infants. *Frontiers in Human Neuroscience*. 2014; 8:209. doi: [10.3389/fnhum.2014.00209](https://doi.org/10.3389/fnhum.2014.00209).
- 869 **Rotem-Kohavi N**, Oberlander TF, Virji-Babul N. Infants and adults have similar regional functional brain  
870 organization for the perception of emotions. *Neuroscience Letters*. 2017; 650(Supplement C):118–125. doi:  
871 [10.1016/j.neulet.2017.04.031](https://doi.org/10.1016/j.neulet.2017.04.031).
- 872 **Rubinov M**, Sporns O. Complex network measures of brain connectivity: Uses and interpretations. *NeuroImage*.  
873 2010; 52(3):1059–1069. doi: [10.1016/j.neuroimage.2009.10.003](https://doi.org/10.1016/j.neuroimage.2009.10.003).
- 874 **Sakkalis V**. Review of advanced techniques for the estimation of brain connectivity measured with EEG/MEG.  
875 *Computers in Biology and Medicine*. 2011; 41(12):1110–1117. doi: [10.1016/j.combiomed.2011.06.020](https://doi.org/10.1016/j.combiomed.2011.06.020).
- 876 **Salvador R**, Anguera M, Gomar J, Bullmore E, Pomarol-Clotet E. Conditional mutual information maps as  
877 descriptors of net connectivity levels in the brain. *Frontiers in Neuroinformatics*. 2010; 4:115–123. doi:  
878 [10.3389/fninf.2010.00115](https://doi.org/10.3389/fninf.2010.00115).

- 879 **Scherg M**, Ille N, Bornfleth H, Berg P. Advanced tools for digital EEG review: Virtual source montages, whole-head  
880 mapping, correlation, and phase analysis. *Journal of Clinical Neurophysiology*. 2002; 19(2):91–112.
- 881 **Schreiber T**. Measuring information transfer. *Physical Review Letters*. 2000; 85(2):461–464. doi: [10.1103/Phys-](https://doi.org/10.1103/PhysRevLett.85.461)  
882 [RevLett.85.461](https://doi.org/10.1103/PhysRevLett.85.461).
- 883 **Seth A**. Granger causality. *Scholarpedia*. 2007; 2(7):1667. revision #91329.
- 884 **Seth AK**, Barrett AB, Barnett L. Granger causality analysis in neuroscience and neuroimaging. *Journal of*  
885 *Neuroscience*. 2015; 35(8):3293–3297. doi: [10.1523/JNEUROSCI.4399-14.2015](https://doi.org/10.1523/JNEUROSCI.4399-14.2015).
- 886 **Shaw P**, Kabani NJ, Lerch JP, Eckstrand K, Lenroot R, Gogtay N, Greenstein D, Clasen L, Evans A, Rapoport JL,  
887 Giedd JN, Wise SP. Neurodevelopmental trajectories of the human cerebral cortex. *Journal of Neuroscience*.  
888 2008; 28(14):3586–3594. doi: [10.1523/JNEUROSCI.5309-07.2008](https://doi.org/10.1523/JNEUROSCI.5309-07.2008).
- 889 **Shovon MHI**, Nandagopal DN, Vijayalakshmi R, Du JT, Cocks B. Transfer entropy and information flow patterns  
890 in functional brain networks during cognitive activity. In: *International Conference on Neural Information*  
891 *Processing* Springer; 2014. p. 1–10.
- 892 **Smit DJA**, Boersma M, Schnack HG, Micheloyannis S, Boomsma DI, Pol HEH, Stam CJ, de Geus EJC. The brain  
893 matures with stronger functional connectivity and decreased randomness of its network. *PLoS ONE*. 2012;  
894 7(5):e36896. doi: [10.1371/journal.pone.0036896](https://doi.org/10.1371/journal.pone.0036896).
- 895 **Snyder AZ**, Raichle ME. A brief history of the resting state: the Washington University perspective. *NeuroImage*.  
896 2012; 62(2):902–910. doi: [10.1016/j.neuroimage.2012.01.044](https://doi.org/10.1016/j.neuroimage.2012.01.044).
- 897 **Sporns O**. *Networks of the Brain*. MIT Press; 2011.
- 898 **Stam CJ**, Van Straaten ECW. The organization of physiological brain networks. *Clinical Neurophysiology*. 2012;  
899 123(6):1067–1087. doi: [10.1016/j.clinph.2012.01.011](https://doi.org/10.1016/j.clinph.2012.01.011).
- 900 **Taylor MJ**, Khan SC. Top-down modulation of early selective attention processes in children. *International*  
901 *Journal of Psychophysiology*. 2000; 37(2):135–147. doi: [10.1016/S0167-8760\(00\)00084-2](https://doi.org/10.1016/S0167-8760(00)00084-2).
- 902 **Toga AW**, Thompson PM, Mori S, Amunts K, Zilles K. Towards multimodal atlases of the human brain. *Nature*  
903 *Reviews Neuroscience*. 2006; 7(12):952–966. doi: [10.1038/nrn2012](https://doi.org/10.1038/nrn2012).
- 904 **Vicente R**, Wibral M, Lindner M, Pipa G. Transfer entropy—a model-free measure of effective connectivity for the  
905 neurosciences. *Journal of Computational Neuroscience*. 2011; 30(1):45–67. doi: [10.1007/s10827-010-0262-3](https://doi.org/10.1007/s10827-010-0262-3).
- 906 **Van de Ville D**, Britz J, Michel CM. EEG microstate sequences in healthy humans at rest reveal scale-  
907 free dynamics. *Proceedings of the National Academy of Sciences*. 2010; 107(42):18179–18184. doi:  
908 [10.1073/pnas.1007841107](https://doi.org/10.1073/pnas.1007841107).
- 909 **Virji-Babul N**, Hilderman CGE, Makan N, Liu A, Smith-Forrester J, Franks C, Wang ZJ. Changes in functional brain  
910 networks following sports-related concussion in adolescents. *Journal of Neurotrauma*. 2014; 31(23):1914–  
911 1919. doi: [/10.1089/neu.2014.3450](https://doi.org/10.1089/neu.2014.3450).
- 912 **Yuan H**, Ding L, Zhu M, Zotev V, Phillips R, Bodurka J. Reconstructing large-scale brain resting-state networks  
913 from high-resolution EEG: spatial and temporal comparisons with fMRI. *Brain Connectivity*. 2016; 6(2):122–135.  
914 doi: [10.1089/brain.2014.0336](https://doi.org/10.1089/brain.2014.0336).



**Table 1.** List of the most active connections based on the ensemble mean of the normalized information flow rate,  $\tau_{i \rightarrow j}$ . All  $\tau_{i \rightarrow j}$  listed exceed the threshold  $\tau_c = 0.05$ . The connections listed are included among those shown in the bottom matrix plot of *Figure 1*. The last column in the table reports the polarization which is equal to the sum of the signs of  $\tau_{i \rightarrow j}$  over the individuals as a percentage of the number of individuals in the study ( $L = 32$ ) [see *Equation 6*].

|    | From | To  | Mean $\tau_{i \rightarrow j}$ | Polarization |
|----|------|-----|-------------------------------|--------------|
| 1  | FL   | TAL | 1.164062e-01                  | 100          |
| 2  | FL   | FpM | 1.062701e-01                  | 100          |
| 3  | TAL  | CL  | 1.048785e-01                  | 100          |
| 4  | FM   | FR  | 1.039752e-01                  | 94           |
| 5  | FL   | FM  | 1.023856e-01                  | 100          |
| 6  | TPL  | CL  | 9.902969e-02                  | 100          |
| 7  | TAL  | FL  | 9.789913e-02                  | 100          |
| 8  | TAR  | FR  | 9.752876e-02                  | 100          |
| 9  | FpM  | FL  | 9.738423e-02                  | 100          |
| 10 | FL   | CL  | 9.737341e-02                  | 100          |
| 11 | FR   | TAR | 9.643028e-02                  | 100          |
| 12 | FM   | FL  | 9.108766e-02                  | 100          |
| 13 | FpM  | FM  | 8.720060e-02                  | 94           |
| 14 | FM   | CL  | 8.698357e-02                  | 94           |
| 15 | TAL  | TPL | 8.462667e-02                  | 94           |
| 16 | FpM  | TAL | 8.422089e-02                  | 88           |
| 17 | PM   | OpM | 8.336186e-02                  | 100          |
| 18 | FpM  | FR  | 8.322882e-02                  | 94           |
| 19 | FM   | CM  | 8.248654e-02                  | 100          |
| 20 | FpM  | CL  | 8.198255e-02                  | 100          |
| 21 | FR   | FM  | 8.095464e-02                  | 94           |
| 22 | FM   | FpM | 8.034528e-02                  | 100          |
| 23 | CM   | FM  | 8.017243e-02                  | 100          |
| 24 | PL   | OpM | 7.770022e-02                  | 100          |
| 25 | FL   | FR  | 7.733949e-02                  | 100          |
| 26 | PR   | OpM | 7.503928e-02                  | 100          |
| 27 | CM   | CL  | 7.419229e-02                  | 100          |
| 28 | TPL  | TAL | 7.341683e-02                  | 100          |
| 29 | TAR  | TPR | 7.276059e-02                  | 100          |
| 30 | FpM  | TAR | 7.214605e-02                  | 94           |

**Table 2.** List of the 15 brain regions used in EEG source space reconstruction in BESA.

| Source Dipole Label | Brain Region                         |
|---------------------|--------------------------------------|
| FL                  | Frontal, left hemisphere             |
| FpM                 | Fronto-polar midline                 |
| FR                  | Frontal, right hemisphere            |
| FM                  | Frontal midline                      |
| CL                  | Central, left hemisphere             |
| CM                  | Central midline                      |
| CR                  | Central, right hemisphere            |
| TPL                 | Posterior temporal, left hemisphere  |
| TAL                 | Anterior temporal, left hemisphere   |
| TAR                 | Anterior temporal, right hemisphere  |
| TPR                 | Posterior temporal, right hemisphere |
| PM                  | Parietal midline                     |
| PL                  | Parietal, left hemisphere            |
| PR                  | Parietal, right hemisphere           |
| OpM                 | Occipital-polar midline              |

## 915 Appendix 1

916 Herein we show how the two entropic components involved, in addition to  $|T_{i \rightarrow j}|$ , in the  
 917 normalization term  $Z_{i \rightarrow j}$ , can be estimated from the data. Analysis based on the theory of  
 918 dynamical systems leads to the following expressions for the rates of change of the entropic  
 919 components  $H_j^*$  and  $H_j^s$  (Liang, 2008)

$$\frac{dH_j^*}{dt} = p_{i,j}, \quad (10a)$$

$$\begin{aligned} \frac{dH_j^s}{dt} &= \frac{\Delta t}{2\hat{C}_{j,j}} \left[ \hat{C}_{d,j,dj} + p_{i,j}^2 \hat{C}_{j,j} + q_{i,j}^2 \hat{C}_{i,i} - 2p_{i,j} \hat{C}_{d,j,j} - 2q_{i,j} \hat{C}_{d,j,i} + 2p_{i,j} q_{i,j} \hat{C}_{j,i} \right] \\ &= \frac{\Delta t}{2} \left[ \hat{r}_{d,j,dj} + p_{i,j}^2 + q_{i,j}^2 \frac{\hat{\sigma}_i^2}{\hat{\sigma}_j^2} - 2p_{i,j} \hat{r}_{d,j,j} - 2q_{i,j} \hat{r}_{d,j,i} \frac{\hat{\sigma}_i}{\hat{\sigma}_j} + 2p_{i,j} q_{i,j} \hat{r}_{j,i} \frac{\hat{\sigma}_i}{\hat{\sigma}_j} \right], \end{aligned} \quad (10b)$$

924 where the entropy transfer elements  $p_{i,j}$ ,  $q_{i,j}$  are given by the following functions of the  
 925 inter-dipole covariance coefficients

$$\begin{aligned} p_{i,j} &= \frac{\hat{C}_{i,i} \hat{C}_{j,dj} - \hat{C}_{j,i} \hat{C}_{i,dj}}{\hat{C}_{j,j} \hat{C}_{i,i} - \hat{C}_{j,i}^2}, \\ q_{i,j} &= \frac{-\hat{C}_{j,i} \hat{C}_{j,dj} + \hat{C}_{j,j} \hat{C}_{i,dj}}{\hat{C}_{j,j} \hat{C}_{i,i} - \hat{C}_{j,i}^2}, \quad i, j = 1, \dots, L. \end{aligned}$$

930 Using the definition in **Equation 2** for the correlation coefficient and the definition in **Equa-**  
 931 **tion 3** for the cross-correlation coefficient, the elements  $p_{i,j}$  and  $q_{i,j}$  can be expressed using  
 932 correlation coefficients  $r$  instead of inter-dipole covariances  $C$  as follows (for  $i, j = 1, \dots, N_s$ ):

$$p_{i,j} = \frac{\hat{r}_{j,dj} - \hat{r}_{j,i} \hat{r}_{i,dj}}{1 - \hat{r}_{j,i}^2}, \quad (11a)$$

$$q_{i,j} = \frac{\frac{\hat{C}_{i,dj}}{\hat{C}_{i,i}} - \frac{\hat{C}_{j,i}}{\hat{C}_{i,i}} \hat{r}_{j,dj}}{1 - \hat{r}_{j,i}^2} = \frac{\hat{\sigma}_j}{\hat{\sigma}_i} \frac{(\hat{r}_{i,dj} - \hat{r}_{j,i} \hat{r}_{j,dj})}{1 - \hat{r}_{j,i}^2}. \quad (11b)$$
